# Supplementary material
Source: PubMed Central journal article supplement (PMC2148281)
Supplement: pnas_0709710104_8.pdf [file pnas_0709710104_8.pdf]

Rh#001.1 *Nitrosomonas europaea* -----  
 Rh#001.2 *Nitrosospira multiformis* -----  
 Rh#001.3 *Acidobacteria bacterium* -----  
 Rh#001.4 *Candidatus Kuenenia* MKKLTLVLYIFFIGLISFLFIEGTKVHASALFEDEFDGKSLNSWIILRENQSDISLTESPGHLR I I SKAEDLWQ INVNK IKLLRRGPHGDFEIVARLTYDPKEK  
 Rh#002 *Danio rerio* -----  
 Rh#003 *Takifugu rubripes* -----  
 Rh#004 *Takifugu rubripes* -----  
 Rh#005 *Takifugu rubripes* -----  
 Rh#006 *Tetraodon nigroviridis* -----  
 Rh#007 *Xenopus tropicalis* -----  
 Rh#008 *Chlamydomonas reinhardtii* -----  
 Rh#009 *Chlamydomonas reinhardtii* -----MSSVLK I P TAMASGA  
 Rh#010 *Apis mellifera* -----  
 Rh#011 *Dictyostelium discoideum* -----  
 Rh#012 *Dictyostelium discoideum* -----  
 Rh#013 *Geodia cydonium* -----  
 Rh#014 *Caenorhabditis elegans* -----  
 Rh#015 *Caenorhabditis briggsae* -----  
 Rh#016 *Caenorhabditis elegans* -----  
 Rh#017 *Caenorhabditis briggsae* -----  
 Rh#018 *Ciona intestinalis* -----  
 Rh#019 *Ciona intestinalis* -----  
 Rh#020 *Ciona intestinalis* -----MCLRC  
 Rh#021 *Carcinus maenas* -----  
 Rh#022 *Anopheles gambiae* -----  
 Rh#023 *Drosophila pseudoobscura* -----  
 Rh#024 *Drosophila melanogaster* -----  
 Rh#025 *Ciona savignyi* -----  
 Rh#026 *Ciona savignyi* -----  
 Rh#027 *Ciona savignyi* -----  
 Rh#028 *Drosophila yakuba* -----  
 Rh#029 *Danio rerio* -----  
 Rh#030 *Salmo salar* -----  
 Rh#031 *Takifugu rubripes* -----  
 Rh#032 *Tetraodon nigroviridis* -----  
 Rh#033 *Xenopus laevis* -----  
 Rh#034 *Xenopus tropicalis* -----  
 Rh#035 *Gallus gallus* -----  
 Rh#036 *Mus musculus* -----  
 Rh#037 *Oncorhynchus mykiss* -----  
 Rh#038 *Rattus norvegicus* -----  
 Rh#039 *Bos taurus* -----  
 Rh#040 *Callithrix jacchus* -----  
 Rh#041 *Canis familiaris* -----  
 Rh#042 *Cebus apella* -----  
 Rh#043 *Macaca fascicularis* -----  
 Rh#044 *Macaca mulatta* -----  
 Rh#045 *Sus scrofa* -----  
 Rh#046 *Gorilla gorilla* -----  
 Rh#047 *Papio papio* -----  
 Rh#048 *Pongo pygmaeus* -----  
 Rh#049 *Pan troglodytes* -----  
 Rh#050 *Homo sapiens* -----  
 Rh#051 *Papio hamadryas* -----  
 Rh#052 *Takifugu rubripes* -----  
 Rh#053 *Danio rerio* -----  
 Rh#054 *Tetraodon nigroviridis* -----  
 Rh#055 *Ambystoma tigrinum* -----  
 Rh#056 *Xenopus laevis* -----  
 Rh#057 *Xenopus tropicalis* -----  
 Rh#058 *Gallus gallus* -----  
 Rh#059 *Mus musculus* -----

Rh#060 *Rattus norvegicus*  
Rh#061 *Bos taurus*  
Rh#062 *Canis familiaris*  
Rh#063 *Cebus apella*  
Rh#064 *Gorilla gorilla*  
Rh#065 *Hylobates sp*  
Rh#066 *Macaca fascicularis*  
Rh#067 *Macaca mulatta*  
Rh#068 *Pongo pygmaeus*  
Rh#069 *Pan troglodytes*  
Rh#070 *Homo sapiens*  
Rh#071 *Danio rerio*  
Rh#072 *Takifugu rubripes*  
Rh#073 *Oryctolagus cuniculus*  
Rh#074 *Oryzias latipes*  
Rh#075 *Tetraodon nigroviridis*  
Rh#076 *Xenopus tropicalis*  
Rh#077 *Xenopus laevis*  
Rh#078 *Gallus gallus*  
Rh#079 *Mus musculus*  
Rh#080 *Rattus norvegicus*  
Rh#081 *Canis familiaris*  
Rh#082 *Bos taurus*  
Rh#083 *Hylobates sp*  
Rh#084 *Sus scrofa*  
Rh#085 *Macaca mulatta*  
Rh#086 *Papio hamadryas*  
Rh#087 *Pongo pygmaeus*  
Rh#088 *Gorilla gorilla*  
Rh#089 *Pan troglodytes*  
Rh#090 *Homo sapiens*  
Rh#091 *Oncorhynchus mykiss*  
Rh#092 *Danio rerio*  
Rh#093 *Takifugu rubripes*  
Rh#094 *Danio rerio*  
Rh#095 *Oryctolagus cuniculus*  
Rh#096 *Tetraodon nigroviridis*  
Rh#097 *Oryzias latipes*  
Rh#098 *Xenopus tropicalis*  
Rh#099 *Xenopus laevis*  
Rh#100 *Gallus gallus*  
Rh#101 *Mus musculus*  
Rh#102 *Rattus norvegicus*  
Rh#103 *Bos taurus*  
Rh#104 *Canis familiaris*  
Rh#105 *Pongo pygmaeus*  
Rh#106 *Pan troglodytes*  
Rh#107 *Homo sapiens*  
Rh#108 *Takifugu rubripes*  
Rh#109 *Tetraodon nigroviridis*  
Rh#110 *Homo sapiens*  
Rh#111 *Gallus gallus*

Rh#001.1 *Nitrosomonas europaea* -----MSKHL<sup>C</sup>FTAFSSIALFLLC-----  
 Rh#001.2 *Nitrosospora multiformis* -----MKKSLCMTLCGTAGFFLLY-----  
 Rh#001.3 *Acidobacteria bacterium* -----MQKKICV<sup>L</sup>G-SACAWWLLG-----  
 Rh#001.4 *Candidatus Kueningenia* FQQA<sup>G</sup>IILYED<sup>E</sup>ENYVMLTRQ<sup>K</sup>DDA<sup>Q</sup>HVVM<sup>S</sup>RSV<sup>S</sup>IK<sup>T</sup>E<sup>G</sup>AK<sup>S</sup>AA<sup>T</sup>SLTTLYLKLTKSGESISGAFSNGETWTTVDHISGLHFKHP<sup>Q</sup>V<sup>G</sup>LV<sup>G</sup>FNAQQKTANADFD  
 Rh#002 *Danio rerio* -----MKNKSNLRLPALIFASEVVIVVLYACFVYDD-----  
 Rh#003 *Takifugu rubripes* -----MNTS<sup>T</sup>SLRVRLPALV<sup>L</sup>LV<sup>L</sup>QV<sup>V</sup>IITLYALFVYDD-----  
 Rh#004 *Takifugu rubripes* -----MHTAVRLNEV<sup>I</sup>IKK<sup>S</sup>KA<sup>K</sup>LVLLNMPGPPRNR-----  
 Rh#005 *Takifugu rubripes* -----MKRQSKSLRVRLPVFVFAEVAFVILYAA<sup>F</sup>VYDE-----  
 Rh#006 *Tetraodon nigroviridis* -----MNTS<sup>T</sup>SLRVRLPV<sup>L</sup>LV<sup>L</sup>LV<sup>L</sup>Q<sup>L</sup>ILISLYAIFVYDN-----  
 Rh#007 *Xenopus tropicalis* -----MSIVFNPSVRCQLPV<sup>L</sup>LL<sup>L</sup>L<sup>L</sup>L<sup>L</sup>Q<sup>G</sup>ILIGLFAVFLSYDE-----  
 Rh#008 *Chlamydomonas reinhardtii* -MQALPPKIPASVSGHGTQSRHSLDW<sup>S</sup>HIGLPSRE<sup>T</sup>QLRAGFVPSAA-----  
 Rh#009 *Chlamydomonas reinhardtii* ASRRHSLDWSHVGLPPRE<sup>P</sup>QLRTG<sup>F</sup>APSVIAIAAVIVGLFFGLTYTE-----  
 Rh#010 *Apis mellifera* -----MFDERNPITQSL<sup>S</sup>ARYLRFAR-----  
 Rh#011 *Dictyostelium discoideum* -----MTHNDDDDHKWTTKRKEPIFF<sup>T</sup>IVILFIQIFM<sup>I</sup>ICFAAL<sup>T</sup>GYDT-----  
 Rh#012 *Dictyostelium discoideum* -----MSKDEHKLPLSKRKESIFMMILFAQVFMV<sup>L</sup>FSVWRYSK-----  
 Rh#013 *Geodia cydonium* -----MDWAKMLPGFLLV<sup>F</sup>QVIFILYGLLVRYDD-----  
 Rh#014 *Caenorhabditis elegans* -----MWSVLHRRQFAIAGLMQTVFIVLFAKYVKYID-----  
 Rh#015 *Caenorhabditis briggsae* -----MWSVLHRRQFAIAGLMQTVFILLFAKYVKYID-----  
 Rh#016 *Caenorhabditis elegans* -----MRSPLHQ<sup>N</sup>QLTLILGLFQV<sup>F</sup>FLVIFALYGSYDA-----  
 Rh#017 *Caenorhabditis briggsae* -----MRSPLHQ<sup>N</sup>QLTLILGLFQAAFLVTFALF<sup>G</sup>SYAP-----  
 Rh#018 *Ciona intestinalis* -----MRGKFS<sup>G</sup>FLLLPQILFIILFGV<sup>F</sup>VEYDT-----  
 Rh#019 *Ciona intestinalis* -----MGNTRGKATALLVAQAII<sup>L</sup>LV<sup>L</sup>FGLFVDYDV-----  
 Rh#020 *Ciona intestinalis* PIPY<sup>M</sup>VRYILKHLFFAHSNTRGKATALLVAQAII<sup>L</sup>LV<sup>L</sup>FGLFVDYDV-----  
 Rh#021 *Carcinus maenas* -----MKLSHG<sup>H</sup>GYLALGL<sup>L</sup>LVFFILFCIFVRYHP-----  
 Rh#022 *Anopheles gambiae* -----MHTPGSS<sup>T</sup>AGYALLIVQV<sup>F</sup>IIVFG<sup>F</sup>CTDYAK-----  
 Rh#023 *Drosophila pseudoobscura* -----MHS<sup>P</sup>AAK<sup>V</sup>SGYIVLMIVQII<sup>F</sup>LV<sup>L</sup>FWLVFVRYEK-----  
 Rh#024 *Drosophila melanogaster* -----MHS<sup>P</sup>AAK<sup>V</sup>SGYV<sup>V</sup>LMIVQII<sup>F</sup>LV<sup>L</sup>FWLVFVRYEK-----  
 Rh#025 *Ciona savignyi* -----MSNTRGKATALLAAEAVFLL<sup>L</sup>FGLFVDYDV-----  
 Rh#026 *Ciona savignyi* -----MSNTRGKATALLVAQAIFLV<sup>L</sup>FGLFVDYDV-----  
 Rh#027 *Ciona savignyi* -----MRGKFS<sup>G</sup>FLLVPQIIFIVLYGV<sup>F</sup>VQYDV-----  
 Rh#028 *Drosophila yakuba* -----MHTPAAK<sup>V</sup>SGYV<sup>V</sup>LMIVQII<sup>F</sup>LV<sup>L</sup>FWLVFVRYEK-----  
 Rh#029 *Danio rerio* -----MAPQYAPS<sup>L</sup>RSRLPLVAFLLE<sup>T</sup>LFL<sup>L</sup>LVFWKIEK-----  
 Rh#030 *Salmo salar* -----MAPQYAQS<sup>L</sup>RFRLLP<sup>L</sup>LLF<sup>L</sup>LQ<sup>T</sup>GFIVVFI<sup>F</sup>YVDIEQ-----  
 Rh#031 *Takifugu rubripes* -----MAPQYAPS<sup>L</sup>RSRLAP<sup>L</sup>LL<sup>L</sup>LQ<sup>T</sup>GMG<sup>F</sup>IAI<sup>V</sup>FYVEIDT-----  
 Rh#032 *Tetraodon nigroviridis* -----MAPQYAPS<sup>L</sup>RSRLAP<sup>L</sup>LL<sup>L</sup>LQ<sup>T</sup>GFIVVFAFYVDIET-----  
 Rh#033 *Xenopus laevis* -----MPPRYT<sup>T</sup>SLRGR<sup>L</sup>PWAILFL<sup>L</sup>Q<sup>T</sup>TFIFIL<sup>F</sup>LHC<sup>F</sup>QDY-----  
 Rh#034 *Xenopus tropicalis* -----MPPRYT<sup>T</sup>SLRGR<sup>L</sup>PWAILLL<sup>L</sup>Q<sup>T</sup>TFIFIL<sup>F</sup>LHC<sup>F</sup>QHDY-----  
 Rh#035 *Gallus gallus* -----MPS<sup>T</sup>YPS<sup>F</sup>RHSVP<sup>W</sup>LILLLEAV<sup>F</sup>IVLSY<sup>F</sup>FLDSIVD-----  
 Rh#036 *Mus musculus* -----MGCKY<sup>P</sup>RS<sup>L</sup>RCCL<sup>P</sup>LWALEV<sup>Q</sup>TAFSLL<sup>F</sup>CF<sup>F</sup>PHDT-----  
 Rh#037 *Oncorhynchus mykiss* -----MAPQYAQS<sup>L</sup>RFRLLP<sup>L</sup>LLF<sup>L</sup>LQ<sup>T</sup>GFIVVFI<sup>V</sup>YVDIEQ-----  
 Rh#038 *Rattus norvegicus* -----MGSKY<sup>P</sup>RS<sup>L</sup>RCCL<sup>P</sup>LWAFGL<sup>Q</sup>VT<sup>F</sup>ILLFY<sup>F</sup>LIGQDP-----  
 Rh#039 *Bos taurus* -----MGSKY<sup>Q</sup>KS<sup>V</sup>RVWLP<sup>L</sup>CAIT<sup>L</sup>EVIFIVIFF<sup>F</sup>TSYSA-----  
 Rh#040 *Callithrix jacchus* -----MGSKY<sup>P</sup>PS<sup>V</sup>RGCL<sup>P</sup>LWALT<sup>L</sup>EAA<sup>F</sup>ILV<sup>F</sup>FF<sup>F</sup>TYDT-----  
 Rh#041 *Canis familiaris* -----MGSKY<sup>P</sup>PS<sup>V</sup>RGCL<sup>P</sup>LWTIA<sup>L</sup>E<sup>L</sup>LAFLVIF<sup>F</sup>FF<sup>F</sup>TSYDT-----  
 Rh#042 *Cebus apella* -----MGSKY<sup>P</sup>PS<sup>V</sup>RGCL<sup>P</sup>LWALT<sup>L</sup>EAA<sup>L</sup>ILV<sup>F</sup>FF<sup>F</sup>TYDT-----  
 Rh#043 *Macaca fascicularis* -----MSSKY<sup>P</sup>RS<sup>V</sup>RCCL<sup>P</sup>LWALT<sup>L</sup>EAA<sup>L</sup>ILL<sup>F</sup>FF<sup>F</sup>TYDA-----  
 Rh#044 *Macaca mulatta* -----MSSKY<sup>P</sup>RS<sup>V</sup>RCCL<sup>P</sup>LWALT<sup>L</sup>EAA<sup>L</sup>ILL<sup>F</sup>FF<sup>F</sup>TYDA-----  
 Rh#045 *Sus scrofa* -----MGSKY<sup>Q</sup>RS<sup>V</sup>RGCL<sup>P</sup>PWILT<sup>L</sup>EVILE<sup>L</sup>V<sup>F</sup>FF<sup>F</sup>TSYDT-----  
 Rh#046 *Gorilla gorilla* -----MSSKY<sup>P</sup>RS<sup>V</sup>RCCL<sup>P</sup>LCAALT<sup>L</sup>EAA<sup>L</sup>TLL<sup>F</sup>YFF<sup>F</sup>THYDA-----  
 Rh#047 *Papio papio* -----MSSKY<sup>P</sup>RS<sup>V</sup>RCCL<sup>P</sup>LWALT<sup>L</sup>EAA<sup>L</sup>ILL<sup>F</sup>FF<sup>F</sup>TYDA-----  
 Rh#048 *Pongo pygmaeus* -----MSSKY<sup>P</sup>RS<sup>V</sup>RCCL<sup>P</sup>LWALT<sup>L</sup>EAA<sup>L</sup>ILL<sup>F</sup>FF<sup>F</sup>TYDA-----  
 Rh#049 *Pan troglodytes* -----MSSKY<sup>P</sup>RS<sup>V</sup>RCL<sup>P</sup>LCAALT<sup>L</sup>EAA<sup>L</sup>ILL<sup>F</sup>YFF<sup>F</sup>TYDA-----  
 Rh#050 *Homo sapiens* -----MSSKY<sup>P</sup>RS<sup>V</sup>RCL<sup>P</sup>LWALT<sup>L</sup>EAA<sup>L</sup>ILL<sup>F</sup>YFF<sup>F</sup>THYDA-----  
 Rh#051 *Papio hamadryas* -----MR<sup>L</sup>K<sup>F</sup>LMAIV<sup>L</sup>EIAMIV<sup>L</sup>FALFVEYEM-----  
 Rh#052 *Takifugu rubripes* -----MPAYA<sup>T</sup>NMR<sup>L</sup>K<sup>F</sup>PIAL<sup>L</sup>TLE<sup>L</sup>L<sup>L</sup>IVL<sup>F</sup>AV<sup>F</sup>VYDD-----  
 Rh#053 *Danio rerio* -----MPTYSTNMR<sup>L</sup>K<sup>F</sup>ILALILEI<sup>T</sup>IVLYALFVYDD-----  
 Rh#054 *Tetraodon nigroviridis* -----MPAYA<sup>T</sup>NMR<sup>L</sup>K<sup>F</sup>PVLA<sup>L</sup>TLEI<sup>T</sup>ILFVAVVYDD-----  
 Rh#055 *Ambystoma tigrinum* -----MALPFA<sup>T</sup>NMR<sup>F</sup>K<sup>S</sup>SLALS<sup>L</sup>QVILILFAIFVSYDT-----  
 Rh#056 *Xenopus laevis* -----MR<sup>F</sup>RLPALALALEIIII<sup>L</sup>FGIV<sup>F</sup>VYDT-----  
 Rh#057 *Xenopus tropicalis* -----MSYS<sup>T</sup>NMR<sup>F</sup>RLPALALEILEIIII<sup>L</sup>FGIV<sup>F</sup>VRYDT-----  
 Rh#058 *Gallus gallus* -----MR<sup>F</sup>K<sup>F</sup>SIIALL<sup>L</sup>EVV<sup>F</sup>IIL<sup>F</sup>GLFVEHDT-----  
 Rh#059 *Mus musculus* -----MR<sup>F</sup>K<sup>F</sup>PLMAIS<sup>L</sup>LEVAMIV<sup>L</sup>FGLFVEYET-----

Rh#060 *Rattus norvegicus* -----MRFKFSLIA<sup>S</sup>LSLE<sup>V</sup>VMIV<sup>S</sup>FA<sup>L</sup>FVEY<sup>E</sup>T  
 Rh#061 *Bos taurus* -----MRFKFPLMAIGLE<sup>V</sup>VMIVL<sup>F</sup>ALFVQY<sup>E</sup>T  
 Rh#062 *Canis familiaris* -----MRFI<sup>F</sup>PTIAV<sup>L</sup>LEAS<sup>M</sup>IVL<sup>F</sup>GFFVKY<sup>E</sup>T  
 Rh#063 *Cebus apella* -----MAIGLDIFMIVL<sup>F</sup>G<sup>L</sup>LFVQY<sup>E</sup>T  
 Rh#064 *Gorilla gorilla* -----MRFTFPLMAIVLEIAMIVL<sup>F</sup>G<sup>L</sup>LFVEY<sup>E</sup>T  
 Rh#065 *Hylobates sp* -----MRFKFPLMAIVLEIAMIVL<sup>F</sup>G<sup>L</sup>LFVEY<sup>E</sup>T  
 Rh#066 *Macaca fascicularis* -----MR<sup>L</sup>KFPLMAIVLEIAMIVL<sup>F</sup>ALFVEY<sup>E</sup>M  
 Rh#067 *Macaca mulatta* -----MR<sup>L</sup>KFPLMAIVLEIAMIVL<sup>F</sup>G<sup>L</sup>LFVEY<sup>E</sup>M  
 Rh#068 *Pongo pygmaeus* -----MR<sup>F</sup>NFPLMAIVLEIAMIVL<sup>F</sup>G<sup>L</sup>LFVEY<sup>E</sup>M  
 Rh#069 *Pan troglodytes* -----MRFTFPLMAIVLEIAMIVL<sup>F</sup>G<sup>L</sup>LFVEY<sup>E</sup>T  
 Rh#070 *Homo sapiens* -----MRFTFPLMAIVLEIAMIVL<sup>F</sup>G<sup>L</sup>LFVEY<sup>E</sup>T  
 Rh#071 *Danio rerio* -----MAESTNLRRLPLICILEVILILFGVLVEYND  
 Rh#072 *Takifugu rubripes* -----MTDAA TNMR<sup>L</sup>KLPITCFILEILILFGTLVQYDY  
 Rh#073 *Oryctolagus cuniculus* -----MAKSPRRVAGRRLLLP<sup>L</sup>LCLFFQGA<sup>T</sup>ALFAIFVRYDQ  
 Rh#074 *Oryzias latipes* -----MTDPS TNMR<sup>L</sup>KLPITCFILQIILILFGVLVQYDE  
 Rh#075 *Tetraodon nigroviridis* -----MADVSTSMRLKLPVVCFILEILILFGALVQYDY  
 Rh#076 *Xenopus tropicalis* -----MTGYS TNMR<sup>I</sup>KLPV<sup>F</sup>CLLLEFITIILFAVFRYDH  
 Rh#077 *Xenopus laevis* -----MTGYS TNMR<sup>I</sup>KLP<sup>F</sup>CLILQFITIILFAVFRYDH  
 Rh#078 *Gallus gallus* -----MAERAAARLHLSGLCFFLQLLTIVLFA<sup>T</sup>FVRYSP  
 Rh#079 *Mus musculus* -----MARVPRHRRLVLP<sup>L</sup>LCLL<sup>F</sup>QGA<sup>T</sup>ALLFAIFVRYNH  
 Rh#080 *Rattus norvegicus* -----MARIPRHRRLVLP<sup>L</sup>LCLL<sup>F</sup>QGA<sup>T</sup>SLLFAIFVRYNH  
 Rh#081 *Canis familiaris* -----MARS<sup>P</sup>RRAGAPRLQLP<sup>L</sup>LCLL<sup>L</sup>LQGA<sup>T</sup>ALFAVFRYNH  
 Rh#082 *Bos taurus* -----MAWS<sup>P</sup>RRHSA<sup>G</sup>RR<sup>L</sup>LQLP<sup>L</sup>LCLL<sup>L</sup>LQGA<sup>T</sup>ALFAVFRYNR  
 Rh#083 *Hylobates sp* -----MAGSPSRAAGRR<sup>L</sup>LQLP<sup>L</sup>LCL<sup>F</sup>LQGA<sup>T</sup>AVLFAVFRYNH  
 Rh#084 *Sus scrofa* -----MAGSSRRAGGR<sup>L</sup>LQLP<sup>L</sup>LCLL<sup>L</sup>LQGA<sup>T</sup>ALFAVFRYNH  
 Rh#085 *Macaca mulatta* -----MAGSPSRAAGRR<sup>L</sup>LQLP<sup>L</sup>LCL<sup>F</sup>LQGA<sup>T</sup>AVLFAVFRYNH  
 Rh#086 *Papio hamadryas* -----MAGSPSRAAGRR<sup>L</sup>LQLP<sup>L</sup>LCL<sup>F</sup>LQGA<sup>T</sup>AVLFAVFRYNH  
 Rh#087 *Pongo pygmaeus* -----MAGSPSRAAGRR<sup>L</sup>LQLP<sup>L</sup>LS-FLQGA<sup>T</sup>AVLFAVFRYNH  
 Rh#088 *Gorilla gorilla* -----MAGSPSRAAGRR<sup>L</sup>LQLP<sup>L</sup>LCL<sup>F</sup>LQGA<sup>T</sup>AVLFAVFRYNH  
 Rh#089 *Pan troglodytes* -----MAGSPSRAAGRR<sup>L</sup>LQLP<sup>L</sup>LCL<sup>F</sup>LQGA<sup>T</sup>AVLFAVFRYNH  
 Rh#090 *Homo sapiens* -----MAGSPSRAAGRR<sup>L</sup>LQLP<sup>L</sup>LCL<sup>F</sup>LQGA<sup>T</sup>AVLFAVFRYNH  
 Rh#091 *Oncorhynchus mykiss* -----MGNFIQGCKDYFSQQKN<sup>T</sup>IRLTL<sup>P</sup>VVC<sup>F</sup>VWQ<sup>I</sup>AMILFGV<sup>F</sup>IRYDE  
 Rh#092 *Danio rerio* -----MGNCFGSRGICDRPKNTNIRLSLPAVC<sup>F</sup>KWQ<sup>V</sup>SMILFGV<sup>F</sup>IRYNE  
 Rh#093 *Takifugu rubripes* -----MGNFFGRQRNAV<sup>R</sup>VSLPAVC<sup>F</sup>VWQ<sup>I</sup>AMILFGV<sup>F</sup>IRYNE  
 Rh#094 *Danio rerio* -----MVKNTNIRISLPAVC<sup>F</sup>VWQ<sup>I</sup>AMILFGV<sup>F</sup>IRYNE  
 Rh#095 *Oryctolagus cuniculus* -----MAWNTNLRWR<sup>L</sup>P<sup>L</sup>LCLV<sup>L</sup>EVAMV<sup>L</sup>L<sup>F</sup>GLFVRYSP  
 Rh#096 *Tetraodon nigroviridis* -----MGCVQSFRNFCDRPKNTN<sup>R</sup>ISLPAVC<sup>F</sup>VWQ<sup>I</sup>AMILFGV<sup>F</sup>IRYNE  
 Rh#097 *Oryzias latipes* -----MGNCCEASNFFGPQKN<sup>T</sup>N<sup>R</sup>VSLPAVC<sup>F</sup>VWQ<sup>I</sup>AMIVL<sup>F</sup>GV<sup>F</sup>IRYDE  
 Rh#098 *Xenopus tropicalis* -----MR<sup>L</sup>RLP<sup>V</sup>VC<sup>F</sup>LWEIAMIVL<sup>F</sup>G<sup>I</sup>FVRYND  
 Rh#099 *Xenopus laevis* -----MLRNSNMRWR<sup>L</sup>P<sup>L</sup>IC<sup>F</sup>VWEIAMIVL<sup>F</sup>G<sup>I</sup>FVRYND  
 Rh#100 *Gallus gallus* -----MERPRHQGMTKNTYMRWR<sup>L</sup>P<sup>L</sup>ICLLWEVAMIILFGV<sup>F</sup>VHFGP  
 Rh#101 *Mus musculus* -----MAWNTNLRGR<sup>L</sup>PITCLILQV<sup>T</sup>TMV<sup>L</sup>L<sup>F</sup>GV<sup>F</sup>FRYDI  
 Rh#102 *Rattus norvegicus* -----MAWNTNLRGR<sup>L</sup>PITCLILQV<sup>T</sup>TMV<sup>L</sup>L<sup>F</sup>GV<sup>F</sup>FRYDI  
 Rh#103 *Bos taurus* -----MIWNTNLRWR<sup>L</sup>PVACL<sup>L</sup>LEVALIALFGV<sup>F</sup>FRYDM  
 Rh#104 *Canis familiaris* -----MVWNTNLRWR<sup>L</sup>PV<sup>T</sup>CLLLQVALV<sup>L</sup>L<sup>F</sup>GV<sup>F</sup>FRYDM  
 Rh#105 *Pongo pygmaeus* -----MAWNTNLRWR<sup>L</sup>P<sup>L</sup>TCLLLE<sup>V</sup>VMVILFGV<sup>F</sup>FRYDF  
 Rh#106 *Pan troglodytes* -----MAWNTNLRWR<sup>L</sup>P<sup>L</sup>TCLLLQVVMVILFGV<sup>F</sup>FRYDF  
 Rh#107 *Homo sapiens* -----MAWNTNLRWR<sup>L</sup>P<sup>L</sup>TCLLLQVIMVILFGV<sup>F</sup>FRYDF  
 Rh#108 *Takifugu rubripes* -----MGCVQSFR<sup>T</sup>LCDR<sup>P</sup>KNTN<sup>R</sup>ISLPAVC<sup>F</sup>VWQ<sup>I</sup>AMILFGV<sup>F</sup>IRYDE  
 Rh#109 *Tetraodon nigroviridis* -----MGNFFGRQRTAY<sup>R</sup>VSLPAV<sup>S</sup>FVWQ<sup>I</sup>AMILFGV<sup>F</sup>IRYDK  
 Rh#110 *Homo sapiens* -----MSSKY<sup>P</sup>RSV<sup>R</sup>RC<sup>L</sup>PLWAL<sup>T</sup>LEAALILLFY<sup>F</sup>FT<sup>H</sup>YDA  
 Rh#111 *Gallus gallus* -----MPS<sup>T</sup>Y<sup>P</sup>SFR<sup>H</sup>SV<sup>P</sup>WLL<sup>F</sup>LEAV<sup>F</sup>IVL<sup>F</sup>Y<sup>F</sup>FVSDVD

|                                     | 20                                  | 30        | 40                                                    | 50                                        | 60                                      | 70                                      | 80                                                | 90                                                |             |
|-------------------------------------|-------------------------------------|-----------|-------------------------------------------------------|-------------------------------------------|-----------------------------------------|-----------------------------------------|---------------------------------------------------|---------------------------------------------------|-------------|
| Rh#001.1 Nitrosomonas europaea      | - FS -SWA -                         | - - - - - | - SAVAP A -E INEARLVAQYNY                             | - - - - -                                 | - S I N I L A M L L V G F G F L M V -   | - F V R R -                             | - Y G F S A T T G T Y L V V A T G L P L Y I L L - | - R A N - -                                       |             |
| Rh#001.2 Nitrosospira multififormis | - LS -AWA -                         | - - - - - | - S E G G T A P Q L N E A R Q V A Q Y N Y -           | - - - - -                                 | - V I H I L A M L L V G F G F L M V -   | - F V K R -                             | - Y G F G A T T G T Y L V V A V G L P L Y I L L - | - R A N - -                                       |             |
| Rh#001.3 Acidobacteria bacterium    | - L P -AWA -                        | - - - - - | - Q G - - T S H V E T S L R Q V A Q Y N Y -           | - - - - -                                 | - S I H I L A M L L V G F G F L M V -   | - F V K K -                             | - Y G S A T T G T Y L V V G A G I P L Y L L L -   | - R L T -                                         |             |
| Rh#001.4 Candidatus Kuenenia        | F F K - I S A -                     | - - - - - | - I G G G V A S A V E E L L E V N K Y N K -           | - - - - -                                 | - S I H V M A M L M V G F G F L M V -   | - Y V K R -                             | - Y G W G A A T A Y I A V S F V I P Y Y M Y L -   | - K S K -                                         |             |
| Rh#002 Danio rerio                  | - H A N A L L Q -                   | - - - - - | - N N Q T - R H M E N S F Y Q N Y P F -               | - - - - -                                 | - F A D I Q V M I F I G F G C L L A -   | - F F R R -                             | - Y G F G G M V F N F L V A T F T I Q W A I L I - | - Q G F - -                                       |             |
| Rh#003 Takifugu rubripes            | - N A D A K M Q -                   | - - - - - | - N N E T - N P M E N S V Y R D Y P F -               | - - - - -                                 | - F A D V Q V M I F I G F G C L L A -   | - F F R F -                             | - Y G F S G M V F N F L T A T F T I Q W A I L V - | - Q G F - -                                       |             |
| Rh#004 Takifugu rubripes            | - T N -                             | - - - - - | - Q T - D P L E N P V Y R D Y P F -                   | - - - - -                                 | - F T D I Q V M I F I G F G C L L A -   | - F F R L -                             | - Y G F G G M A F N F L M A T F A I Q W A I L V - | - Q G Y - -                                       |             |
| Rh#005 Takifugu rubripes            | - H A D A K F Q T N -               | - - - - - | - Q T - D P L E N P V Y R D Y P F -                   | - - - - -                                 | - F T D I Q V M I F I G F G C L L A -   | - F F R L -                             | - Y G F G G M A F N F L M A T F A I Q W A I L V - | - Q G Y - -                                       |             |
| Rh#006 Tetraodon nigroviridis       | - N A N A K M Q -                   | - - - - - | - N N E T - N P M D N S V Y R D Y P F -               | - - - - -                                 | - F A D V Q V M I F I G F G C L L A -   | - F F R F -                             | - Y G F S G M V F N F L T A T F T I Q W A I L V - | - Q G F - -                                       |             |
| Rh#007 Xenopus tropicalis           | - L S S A T S -                     | - - - - - | - L A N I T - V A N T H D L D T Y P L -               | - - - - -                                 | - F K D V Q L M L F V G L G L L L S -   | - F L K L -                             | - Y G F G M A L N L V I A N F S I Q W A V L V -   | - Q G F - -                                       |             |
| Rh#008 Chlamydomonas reinhardtii    | - V V I V I F V G L F F G -         | - - - - - | - L T Q Y T E L G - T N A Q E E V D R F Y K Y -       | - - - - -                                 | - L V D V N I M V W I G F G F L M T -   | - F M R R -                             | - Y G Y G A V A L N Y F A S A L M F L E A I L M - | - I G A -                                         |             |
| Rh#009 Chlamydomonas reinhardtii    | - L A E N -                         | - - - - - | - A Q E Q V E R Y Y K Y -                             | - - - - -                                 | - F I D V Q V M I F I G F G F L M T -   | - F M R R -                             | - Y S G A V S L N Y F A S A L M F L E A I L M -   | - I G A -                                         |             |
| Rh#010 Apis mellifera               | - K N D D P -                       | - - - - - | - - - - -                                             | - D Q P D F P V I M H S -                 | - - - - -                               | - L Y Q D V H V M I W I G F G F L M T - | - F L R R -                                       | - Y G Q S A V G L T F L L G A I L V Q V A I I C - | - E G V -   |
| Rh#011 Dictyostelium discoideum     | - N K N Y T G S E N P -             | - - - - - | - D E F K G - G E V Q E R V N N F Y G Y -             | - - - - -                                 | - F R D I N I M I F F G F G F L M T -   | - F L R R -                             | - Y G Y S A L G Y T F I I S A L V S Q W S V L L - | - N G F - -                                       |             |
| Rh#012 Dictyostelium discoideum     | - N E V N Y S T L T P -             | - - - - - | - E Q L Q E L E A T G - G V V Q E E V T N I Y G Y -   | - - - - -                                 | - F R D I N I M I F F G F G F L M T -   | - F L R R -                             | - Y G Y S A L G Y T F I I S A L V A Q W S V L I - | - Y G F - -                                       |             |
| Rh#013 Geodia cydonium              | - T G D A I R N D T T I S -         | - - - - - | - D V S N - L D S Y R S T L K V Y P F -               | - - - - -                                 | - F Q D V H V M I F V G F G F L M T -   | - F L R R -                             | - Y G F G S I S F N L L L A S F A I Q W S T L T - | - S G V - -                                       |             |
| Rh#014 Caenorhabditis elegans       | - P L D D S R -                     | - - - - - | - - - - -                                             | - R V Y S G T D Y P L -                   | - - - - -                               | - F Q D V H L M I F V G F G F L M A -   | - F L K R -                                       | - Y G F S A V S V N L L L S A F V I Q F A M L L - | - R G F - - |
| Rh#015 Caenorhabditis briggsae      | - P L D D S R -                     | - - - - - | - - - - -                                             | - R V Y S G T D Y P L -                   | - - - - -                               | - F Q D V H L M I F V G F G F L M A -   | - F L K R -                                       | - Y G F S A V S V N L L L S A F V I Q F A M L L - | - R G F - - |
| Rh#016 Caenorhabditis elegans       | - S A L P S -                       | - - - - - | - E T K N - V E E A A R M T N L Y P L -               | - - - - -                                 | - F Q D T H V M I F I G F G F L M T -   | - F L K R -                             | - Y G F S A V S I N M L L A V F T I Q W G I I V - | - R G M -                                         |             |
| Rh#017 Caenorhabditis briggsae      | - S A L P S -                       | - - - - - | - N G K D - V E E A T R M T N L Y P L -               | - - - - -                                 | - F Q D T H V M I F I G F G F L M T -   | - F L K R -                             | - Y G F S A V S I N M L L A V F T I Q W G I I V - | - R G M -                                         |             |
| Rh#018 Ciona intestinalis           | - V A G P R -                       | - - - - - | - N A S S - T A G I E E F D N L Y P M -               | - - - - -                                 | - F Q D V H V M I F I G F G F L M T -   | - F L K R -                             | - Y G F G S V G F N F M L A A F V I Q W T I L M - | - R G C - -                                       |             |
| Rh#019 Ciona intestinalis           | - A A G P R -                       | - - - - - | - N N S - L T T H T T L A H Y P I -                   | - - - - -                                 | - Y Q D V H V M M L I G F G F L M T -   | - F L K R -                             | - H G F G S V G F N F L L T C Y V I E W S T L V - | - N G W - -                                       |             |
| Rh#020 Ciona intestinalis           | - A A G P R -                       | - - - - - | - N N S - L T T H T T L A H Y P I -                   | - - - - -                                 | - Y Q D V H V M M L I G F G F L M T -   | - F L K R -                             | - H G F G S V G F N F L L T C Y V I E W S T L V - | - N G W - -                                       |             |
| Rh#021 Carcinus maenas              | - D A N A R H H P L V N G -         | - - - - - | - T K L E D K L D H Y K - S D D P W A H S R T Y P M - | - - - - -                                 | - F Q D V H V M I F I G F G F L M M -   | - F L K R -                             | - Y G L S A V G M N F L I A A L C L Q W A I L V - | - N G F - -                                       |             |
| Rh#022 Anopheles gambiae            | - E L L P V K N E T A R -           | - - - - - | - V H S P - A E S E G G N L R K Y P H -               | - - - - -                                 | - F Q D I H V M I F A G F A F L M T -   | - F L K R -                             | - Y G F S A S G L N L L V A A L V Q W A I M -     | - R G C - -                                       |             |
| Rh#023 Drosophila pseudoobscura     | - A A M P P A L G -                 | - - - - - | - A E D - A G S A N E H V S K Y P Q -                 | - - - - -                                 | - F Q D I Q V M I F I G F G F L M T -   | - F L R K -                             | - Y G Y S A T G F T L F M A S L V V Q W S V L M - | - K G F - -                                       |             |
| Rh#024 Drosophila melanogaster      | - T A L P L A I D -                 | - - - - - | - A E D - A G S A N E H V S K Y P Q -                 | - - - - -                                 | - F Q D I Q V M I F I G F G F L M T -   | - F L R K -                             | - Y G Y S A T G F T L F M A A L V V Q W A V L M - | - K G F - -                                       |             |
| Rh#025 Ciona savignyi               | - A A G P R -                       | - - - - - | - N N S - L S M D T T L D H Y P I -                   | - - - - -                                 | - Y Q D V H V M M L I G F G F L M T -   | - F L K R -                             | - H G F G S V G F N F L L T C F I I Q W S T L V - | - N G W - -                                       |             |
| Rh#026 Ciona savignyi               | - S A G P R -                       | - - - - - | - N S S - L S T H S T L A H Y P M -                   | - - - - -                                 | - Y Q D V H V M M V I G F G F L M T -   | - F L K R -                             | - H G F G S V G F N F L L T C F V I Q W S I L V - | - N G W - -                                       |             |
| Rh#027 Ciona savignyi               | - Q A G P R -                       | - - - - - | - N A S D - T T S S E H F D K L Y P M -               | - - - - -                                 | - F Q D V H V M I F I G F G F L M T -   | - F L R R -                             | - Y G F G S V G F N F M L A A F V I Q W T I L I - | - R G C - -                                       |             |
| Rh#028 Drosophila yakuba            | - T V L P L A I D -                 | - - - - - | - A E D - A G S A N E H V S K Y P Q -                 | - - - - -                                 | - F Q D I Q V M I F I G F G F L M T -   | - F L R K -                             | - Y G Y S A T G F T L F M A A L V V Q W A V L M - | - K G F - -                                       |             |
| Rh#029 Danio rerio                  | - Q E Y R R S -                     | - - - - - | - E S E P F V H S Y A D -                             | - - - - -                                 | - F Q D V H V M I F M G F G F L A T -   | - F L V R -                             | - Y G L S G S G F N L L A A M A V Q W A V L M -   | - N G F - -                                       |             |
| Rh#030 Salmo salar                  | - N V Q T K -                       | - - - - - | - Q H A F T N Y S -                                   | - - - - -                                 | - E F Q D V H V M V I L G F G F L A T - | - F L V R -                             | - Y S F S G A G F T L L V A A M A V Q W A V I L - | - N G V - -                                       |             |
| Rh#031 Takifugu rubripes            | - H T D L T R -                     | - - - - - | - - - - -                                             | - D F Y A T -                             | - - - - -                               | - F Q D V Q V I V F L G F G F L G S -   | - F L V R -                                       | - Y G F S S I G F N L L V A A V A T Q W A I V L - | - N G M - - |
| Rh#032 Tetraodon nigroviridis       | - H S F N -                         | - - - - - | - T D L T S N F Y A E -                               | - - - - -                                 | - F Q D V H V I V F L G F G F L S T -   | - F L I R -                             | - Y G F S G V G F N L L V A A T A T Q W A I L L - | - N G L - -                                       |             |
| Rh#033 Xenopus laevis               | - T A D A K -                       | - - - - - | - Y L Q T Y P A -                                     | - - - - -                                 | - L Q D V N V I I L G F G F L F G -     | - S L K K -                             | - F V F S G V A F N F L I T T L G I Q W A I I V - | - D S F - -                                       |             |
| Rh#034 Xenopus tropicalis           | - T P N -                           | - - - - - | - A K Y I Q K Y P G -                                 | - - - - -                                 | - I Q D V N V I I L G F G F L F G -     | - S L K K -                             | - F V F S G V A F N F L I T A L G I Q W A I I V - | - D S F - -                                       |             |
| Rh#035 Gallus gallus                | - A H F P -                         | - - - - - | - - - - -                                             | - Y P D -                                 | - - - - -                               | - L Q D V S H M L I F G F G F L L T -   | - F L K R -                                       | - Y S F S S T G F S L L I V I L G V Q C S I L M - | - E H V -   |
| Rh#036 Mus musculus                 | - A Q V D H R -                     | - - - - - | - F M A S Y Q V -                                     | - - - - -                                 | - L R N L T L M A A L G F G F L S S -   | - S F R R -                             | - H S W S S V A F N L F M L A L G V Q G T I L L - | - D H F - -                                       |             |
| Rh#037 Oncorhynchus mykiss          | - N V Q T K -                       | - - - - - | - Q H A F N N Y S -                                   | - - - - -                                 | - E F Q D V H V M V I L G F G F L A T - | - F L V R -                             | - Y S F S G A G F T L L V A A M A V Q W A V I L - | - N G V - -                                       |             |
| Rh#038 Rattus norvegicus            | - I Q A D H K -                     | - - - - - | - F M A I Y Q V -                                     | - - - - -                                 | - I Q D L T L V A A L G F G F L S S -   | - S F R R -                             | - H G W S S V A F S F F M L A L G V Q G T I L L - | - D Y F - -                                       |             |
| Rh#039 Bos taurus                   | - S V D E Q K -                     | - - - - - | - K L L R D Y R A -                                   | - - - - -                                 | - F Q D V F I M A T F G F G F L N T -   | - S L R R -                             | - H C W S S I A F N L F L L V L G V Q L A A L L - | - D G F - -                                       |             |
| Rh#040 Callithrix jacchus           | - S L E D -                         | - - - - - | - Q K V L M A F Y Q V -                               | - - - - -                                 | - C Q D L T V M A A L G L G F L T S -   | - S L R R -                             | - H S W S S V A F N L F M L A L G V Q W A I L L - | - D G F - -                                       |             |
| Rh#041 Canis familiaris             | - S S Q D P -                       | - - - - - | - K E L M G I Y R V -                                 | - - - - -                                 | - L Q D V T I M A A L G F G F L N S -   | - S L R R -                             | - Y G W S S V A F N L F L L A L G V Q W A V L V - | - D G F - -                                       |             |
| Rh#042 Cebus apella                 | - S L E D -                         | - - - - - | - Q K V L M A F Y Q V -                               | - - - - -                                 | - C Q D L T V M A A L G L G F L T S -   | - S L R R -                             | - H G W S S V A F N L F L L A L G V Q W A I L L - | - D G F - -                                       |             |
| Rh#043 Macaca fascicularis          | - S L E D Q K G -                   | - - - - - | - L V A S Y Q V -                                     | - - - - -                                 | - C Q D L T V M A V L G L G F F T S -   | - N L R R -                             | - N S W S S V A F N L F L L A L G V Q W A I L L - | - D G F - -                                       |             |
| Rh#044 Macaca mulatta               | - S L E D Q K G -                   | - - - - - | - L V A S Y Q V -                                     | - - - - -                                 | - C Q D L T V M A V L G L G F F T S -   | - N L R R -                             | - N S W S S V A F N L F L L A L G V Q W A I L L - | - D G F - -                                       |             |
| Rh#045 Sus scrofa                   | - S S K A Q K -                     | - - - - - | - E F L G T Y Q G -                                   | - - - - -                                 | - F Q D V V I I A A L G L G F L N T -   | - S L R R -                             | - H C W S S V A F N L F L L A L G V Q L T L L L - | - D G F - -                                       |             |
| Rh#046 Gorilla gorilla              | - S L E D Q K G -                   | - - - - - | - L V A S Y Q V G -                                   | - - - - -                                 | - Q D L T V M A A I G F G F L T S -     | - S F R G -                             | - H S W S S V A F N L F M L A L G V Q W A I L L - | - D G F - -                                       |             |
| Rh#047 Papio papio                  | - S L E D Q K G -                   | - - - - - | - L V A S Y Q V -                                     | - - - - -                                 | - C Q D L T V M A V L G L G F F T S -   | - N L R R -                             | - N S W S S V A F N L V L L A L G V Q W A I L L - | - D V F - -                                       |             |
| Rh#048 Pongo pygmaeus               | - S L E D Q K G -                   | - - - - - | - L V A S Y Q V -                                     | - - - - -                                 | - C Q D L T V M A V L G L G F F T S -   | - N L R R -                             | - N S W S S V A F N L V L L A L G V Q W A I L L - | - D G F - -                                       |             |
| Rh#049 Pan troglodytes              | - S L E D Q K G -                   | - - - - - | - L V A S Y Q V G -                                   | - - - - -                                 | - Q D L T V M A A I G F G F L T S -     | - S F R R -                             | - H S W S S V A F S L F M L A L G V Q W A I L L - | - D G F - -                                       |             |
| Rh#050 Homo sapiens                 | - S L E D Q K G -                   | - - - - - | - L V A S Y Q V G -                                   | - - - - -                                 | - Q D L T V M A A L G L G F L T S -     | - N F R R -                             | - H S W S S V A F N L F M L A L G V Q W A I L L - | - D G F - -                                       |             |
| Rh#051 Papio hamadryas              | - D Q T T P Q -                     | - - - - - | - Q L N I T T - S T D M G K F L E L Y P L -           | - - - - -                                 | - F Q D V H V M I F V G F G F L M T -   | - F L K K -                             | - Y G F S S V G I N L L I A A L G L Q W G T V V - | - Q G I - -                                       |             |
| Rh#052 Takifugu rubripes            | - G K P S S D P H D P -             | - - - - - | - H D P H A G N - H T Q E G A P M D L Y P M -         | - - - - -                                 | - F Q D V H V M I F I G F G F L M T -   | - F L K R -                             | - Y G F S S V G V N L L L A A F G L Q W G L L M - | - Q G F - -                                       |             |
| Rh#053 Danio rerio                  | - G D P K G H G -                   | - - - - - | - D H H E K - S N Q T E S P M T L Y P M -             | - - - - -                                 | - F Q D V H V M I F I G F G F L M T -   | - F L K R -                             | - Y G F T S V G V N L L L A A F G L Q W G L L M - | - Q N V - -                                       |             |
| Rh#054 Tetraodon nigroviridis       | - A K P G E G -                     | - - - - - | - S H S S N - H T Q E Q G P M E L Y P M -             | - - - - -                                 | - F Q D V H V M I F I G F G F L M T -   | - F L K R -                             | - Y G F S S V G V N L L L A A F G L Q W G L L M - | - Q G I - -                                       |             |
| Rh#055 Ambystoma tigrinum           | - P H H E D S -                     | - - - - - | - H G N S - T H Q E D E F I K L Y P L -               | - - - - -                                 | - F Q D V H V M I F I G F G F L M T -   | - F L K R -                             | - Y G F S S V G I N L L I A A L G L Q W G T L M - | - Q G L - -                                       |             |
| Rh#056 Xenopus laevis               | - S E H N D P -                     | - - - - - | - Q H N S - T A G Y S Q F L S L Y P L -               | - - - - -                                 | - F Q D V H V M I F V G F G F L M T -   | - F L K R -                             | - Y G F S S V G V N M L I A A L G L Q W G I L M - | - Q G F - -                                       |             |
| Rh#057 Xenopus tropicalis           | - H N L T D P -                     | - - - - - | - H N N S - T S G Y S Q F L S L Y P L -               | - - - - -                                 | - F Q D V H V M I F V G F G F L M T -   | - F L K R -                             | - Y G F S S V G I N M L I A A L G L Q W G I L M - | - Q G F - -                                       |             |
| Rh#058 Gallus gallus                | - G N -                             | - - - - - | - - - - -                                             | - T S L Y P Y -                           | - - - - -                               | - F K D V H V M I F I G F G F L M T -   | - F L K K -                                       | - Y G F T S V G I N M L I A A F G L Q W G T L M - | - Q G F - - |
| Rh#059 Mus musculus                 | - P Q N A S Q K N A S H Q N A S Q - | - - - - - | - - - - -                                             | - Q G N T S S - S A K K D Q F F L Y P L - | - - - - -                               | - F Q D V H V M I F V G F G F L M T -   | - F L K K -                                       | - Y G F S G V G F N L F L A A L G L Q W G T I M - | - Q G L - - |



|                                      | 20    | 30         | 40    | 50         | 60       | 70           | 80        | 90        |
|--------------------------------------|-------|------------|-------|------------|----------|--------------|-----------|-----------|
| Rh#060 <i>Rattus norvegicus</i>      | -SQNG | GSQKSAS    | QQNAS | QQNAAA     | QQNAS    | QQGNASS      | -PAKEDQ   | FFQLYPL   |
| Rh#061 <i>Bos taurus</i>             | -SVN  | TSRN       | -P    | -----      | -NETESA  | -AMDVEK      | TMESY     | PF        |
| Rh#062 <i>Canis familiaris</i>       | -EQNA | IQ         | ----- | -QPNSTN    | -STKVDRS | LELYPL       | -----     | FQDVHVM   |
| Rh#063 <i>Cebus apella</i>           | -DQ   | -HTQ       | ----- | -QRNITK    | -PTDLA   | TFLVLYPL     | -----     | FQDVHVM   |
| Rh#064 <i>Gorilla gorilla</i>        | -DQTV | LE         | ----- | -QLNITK    | -PTDMGI  | FFELYPL      | -----     | FQDVHVM   |
| Rh#065 <i>Hylobates sp</i>           | -DQTV | LE         | ----- | -QLNITK    | -STD     | MGTFFELYPL   | -----     | FQDVHVM   |
| Rh#066 <i>Macaca fascicularis</i>    | -DQTT | PQ         | ----- | -QLNITN    | -STD     | MGKFLELYPL   | -----     | FQDVHVM   |
| Rh#067 <i>Macaca mulatta</i>         | -DQTT | PQ         | ----- | -QLNITT    | -STD     | MGKFLELYPL   | -----     | FQDVHVM   |
| Rh#068 <i>Pongo pygmaeus</i>         | -DQTV | LE         | ----- | -QLSITK    | -STD     | MGTFFELYPL   | -----     | FQDVHVM   |
| Rh#069 <i>Pan troglodytes</i>        | -DQTV | LE         | ----- | -QLNITT    | -PT      | DMGTFFFELYPL | -----     | FQDVHVM   |
| Rh#070 <i>Homo sapiens</i>           | -DQTV | LE         | ----- | -QLNITK    | -PT      | DMGITFFELYPL | -----     | FQDVHVM   |
| Rh#071 <i>Danio rerio</i>            | -D    | TDAKKWN    | ----- | -KNNST     | -DPA     | TNEFYRYP     | PS        | -----     |
| Rh#072 <i>Takifugu rubripes</i>      | -E    | TDAKEWH    | ----- | -N         | -TSH     | -QDYEND      | FYFRYP    | PS        |
| Rh#073 <i>Oryctolagus cuniculus</i>  | -Q    | TDAALWHG   | ----- | -GNH       | -SNADNE  | FYFRYP       | PS        | -----     |
| Rh#074 <i>Oryzias latipes</i>        | -D    | TDAKHHHG   | ----- | -NHSEK     | -SD      | IENDFYRYP    | PS        | -----     |
| Rh#075 <i>Tetraodon nigroviridis</i> | -E    | TDAKEWH    | ----- | -N         | -QSH     | -NDYEND      | FYFRYP    | PS        |
| Rh#076 <i>Xenopus tropicalis</i>     | -E    | SDAKQWHD   | ----- | -EMRNHSV   | -QNAEND  | FYFRYP       | PS        | -----     |
| Rh#077 <i>Xenopus laevis</i>         | -E    | SDARG      | ----- | -WHDE      | LKNHST   | -ANADND      | FYFRYP    | PS        |
| Rh#078 <i>Gallus gallus</i>          | -E    | S          | -SN   | -----      | -LCS     | TEPRC        | -SQRD     | PSPTLGYPR |
| Rh#079 <i>Mus musculus</i>           | -E    | TDAALWHWG  | ----- | -NH        | -SNVDNE  | FYFRYP       | PS        | -----     |
| Rh#080 <i>Rattus norvegicus</i>      | -E    | TDAALWHWG  | ----- | -NH        | -SNVDNE  | FYFRYP       | PS        | -----     |
| Rh#081 <i>Canis familiaris</i>       | -E    | TDAALWHWG  | ----- | -NH        | -SNLDNE  | FYFRYP       | PS        | -----     |
| Rh#082 <i>Bos taurus</i>             | -E    | TDAALWHWG  | ----- | -NH        | -SNADNE  | FYFRYP       | PS        | -----     |
| Rh#083 <i>Hylobates sp</i>           | -K    | TDAALWH    | P     | -----      | -GNN     | -SNADNE      | FYFRYP    | PS        |
| Rh#084 <i>Sus scrofa</i>             | -E    | TDAALWHWG  | ----- | -NH        | -SN      | PDNE         | FYFRYP    | PS        |
| Rh#085 <i>Macaca mulatta</i>         | -K    | TDAALWHRG  | ----- | -NH        | -SNADNE  | FYFRYP       | PS        | -----     |
| Rh#086 <i>Papio hamadryas</i>        | -K    | TDAALWHRG  | ----- | -NY        | -SNADNE  | FYFRYP       | PS        | -----     |
| Rh#087 <i>Pongo pygmaeus</i>         | -K    | TDAALWHRG  | ----- | -NH        | -SNADNE  | FYFRYP       | PS        | -----     |
| Rh#088 <i>Gorilla gorilla</i>        | -K    | TDAALWHR   | ----- | -SNH       | -SNADNE  | FYFRYP       | PS        | -----     |
| Rh#089 <i>Pan troglodytes</i>        | -K    | TDAALWHR   | ----- | -SNH       | -SNADNE  | FYFRYP       | PS        | -----     |
| Rh#090 <i>Homo sapiens</i>           | -K    | TDAALWHR   | ----- | -SNH       | -SNADNE  | FYFRYP       | PS        | -----     |
| Rh#091 <i>Oncorhynchus mykiss</i>    | -E    | SDTHWVETK  | ----- | -AHDNIT    | -SD      | IENDFYRYP    | PS        | -----     |
| Rh#092 <i>Danio rerio</i>            | -E    | ADTHWVYTK  | ----- | -KDKNKT    | -SD      | IENDFYRYP    | PS        | -----     |
| Rh#093 <i>Takifugu rubripes</i>      | -E    | SDAHWWEHK  | ----- | -KTNNIT    | -SD      | IENDFYRYP    | PS        | -----     |
| Rh#094 <i>Danio rerio</i>            | -E    | SDSHWVETR  | ----- | -KKNNIS    | -TD      | LENDFYRYP    | PS        | -----     |
| Rh#095 <i>Oryctolagus cuniculus</i>  | -D    | ADSSWSNEK  | ----- | -RKNIT     | -SD      | LENEFYRYP    | PS        | -----     |
| Rh#096 <i>Tetraodon nigroviridis</i> | -E    | ADTHWWEYR  | ----- | -KKENIS    | -SD      | IENDFYRYP    | PS        | -----     |
| Rh#097 <i>Oryzias latipes</i>        | -E    | SDAHWVELK  | ----- | -KTENL     | -TD      | LQNEFYRYP    | PS        | -----     |
| Rh#098 <i>Xenopus tropicalis</i>     | -E    | ADPHWS     | ----- | -EFMKAQNIT | -SD      | IENDFYRYP    | PS        | -----     |
| Rh#099 <i>Xenopus laevis</i>         | -E    | ADPHWP     | ----- | -IFMKHENIT | -SD      | IENDFYRYP    | PS        | -----     |
| Rh#100 <i>Gallus gallus</i>          | -E    | ADAHWEEEK  | ----- | -REMNLIT   | -SD      | IENDFYRYP    | PS        | -----     |
| Rh#101 <i>Mus musculus</i>           | -Q    | ADAHWWLEK  | ----- | -KRKNIS    | -SD      | VENEFYRYP    | PS        | -----     |
| Rh#102 <i>Rattus norvegicus</i>      | -Q    | ADAHWWLEK  | ----- | -KRKNIS    | -SD      | VENEFYRYP    | PS        | -----     |
| Rh#103 <i>Bos taurus</i>             | -D    | ADPHWQEK   | ----- | -V         | IKNLS    | -TD          | LENEFYRYP | PS        |
| Rh#104 <i>Canis familiaris</i>       | -D    | ADPHWIDKK  | ----- | -EAENST    | -SD      | MENEFYRYP    | PS        | -----     |
| Rh#105 <i>Pongo pygmaeus</i>         | -D    | ADAHWWSWR  | ----- | -----      | -TE      | FYRYP        | PS        | -----     |
| Rh#106 <i>Pan troglodytes</i>        | -E    | ADAHWWSER  | ----- | -THKNL     | -SD      | VENEFYRYP    | PS        | -----     |
| Rh#107 <i>Homo sapiens</i>           | -E    | ADAHWWSER  | ----- | -THKNL     | -SD      | MENEFYRYP    | PS        | -----     |
| Rh#108 <i>Takifugu rubripes</i>      | -E    | SDTHWVIEHR | ----- | -KKENIS    | -SD      | IENDFYRYP    | PS        | -----     |
| Rh#109 <i>Tetraodon nigroviridis</i> | -E    | SDAHWVEYK  | ----- | -KSHNIT    | -SD      | IENDFYRYP    | PS        | -----     |
| Rh#110 <i>Homo sapiens</i>           | -S    | LEDQKG     | ----- | -----      | -L       | VASYQVG      | -----     | QDLTVMAA  |
| Rh#111 <i>Gallus gallus</i>          | -A    | H          | ----- | -----      | -FF      | YDP          | -----     | FQDVHML   |



|                                     | 100                                  | 110                              | 120                          | 130                         | 140                        | 150                             | 160                            |                          |                            |                          |                              |                               |                              |                               |                               |                            |                                   |                           |                                 |                           |                                     |                                      |                               |                                  |                              |                             |                            |                                 |                          |                                |                              |                               |                            |                                 |                                      |                            |                             |   |   |   |   |   |   |   |   |   |   |   |
|-------------------------------------|--------------------------------------|----------------------------------|------------------------------|-----------------------------|----------------------------|---------------------------------|--------------------------------|--------------------------|----------------------------|--------------------------|------------------------------|-------------------------------|------------------------------|-------------------------------|-------------------------------|----------------------------|-----------------------------------|---------------------------|---------------------------------|---------------------------|-------------------------------------|--------------------------------------|-------------------------------|----------------------------------|------------------------------|-----------------------------|----------------------------|---------------------------------|--------------------------|--------------------------------|------------------------------|-------------------------------|----------------------------|---------------------------------|--------------------------------------|----------------------------|-----------------------------|---|---|---|---|---|---|---|---|---|---|---|
| Rh#060 <i>Rattus norvegicus</i>     | L--H-----S--HGL-----                 | KFPFR                            | IKNMI                        | NADF                        | STATV                      | LIS                             | FGAVL                          | GKTS                     | SP                         | IQMI                     | IMT                          | ILE                           | I                            | IAV                           | FAG                           | NEHL                       | VT                                | E                         | IFK                             | AS                        |                                     |                                      |                               |                                  |                              |                             |                            |                                 |                          |                                |                              |                               |                            |                                 |                                      |                            |                             |   |   |   |   |   |   |   |   |   |   |   |
| Rh#061 <i>Bos taurus</i>            | F--R-----S--HGQ-----                 | KFL                              | IEMKNI                       | HADFS                       | TVTVL                      | LIS                             | FGAVL                          | GKTS                     | SP                         | VQML                     | IMT                          | ILE                           | I                            | TVY                           | AA                            | NEY                        | LV                                | FK                        | IL                              | WAS                       |                                     |                                      |                               |                                  |                              |                             |                            |                                 |                          |                                |                              |                               |                            |                                 |                                      |                            |                             |   |   |   |   |   |   |   |   |   |   |   |
| Rh#062 <i>Canis familiaris</i>      | V--H-----R--HGQ-----                 | T                                | YIG                          | IKNMI                       | NADF                       | STATV                           | LIS                            | FGAVL                    | GKI                        | SP                       | TQML                         | IMT                           | I                            | E                             | I                             | TV                         | FAG                               | NEY                       | VV                              | GE                        | IFQAS                               |                                      |                               |                                  |                              |                             |                            |                                 |                          |                                |                              |                               |                            |                                 |                                      |                            |                             |   |   |   |   |   |   |   |   |   |   |   |
| Rh#063 <i>Cebus apella</i>          | L--H-----S--HGQ-----                 | K                                | INIG                         | IKNMI                       | NADF                       | STATV                           | LIS                            | FGAVL                    | GKTS                       | SP                       | IQML                         | IMT                           | I                            | E                             | I                             | A                          | FF                                | AG                        | NEY                             | LV                        | GE                                  | IFKAS                                |                               |                                  |                              |                             |                            |                                 |                          |                                |                              |                               |                            |                                 |                                      |                            |                             |   |   |   |   |   |   |   |   |   |   |   |
| Rh#064 <i>Gorilla gorilla</i>       | L--Q-----S--QGQ-----                 | K                                | FNIG                         | IKNMI                       | NADF                       | SAA                             | TVL                            | LIS                      | FGAVL                      | GKTS                     | SP                           | SQML                          | IMT                          | I                             | LE                            | I                          | V                                 | FF                        | AH                              | NEY                       | LV                                  | SE                                   | IFKAS                         |                                  |                              |                             |                            |                                 |                          |                                |                              |                               |                            |                                 |                                      |                            |                             |   |   |   |   |   |   |   |   |   |   |   |
| Rh#065 <i>Hylobates sp</i>          | L--H-----S--QGQ-----                 | K                                | FNIG                         | IKNMI                       | NADF                       | SAA                             | TVL                            | LIS                      | FGAVL                      | GKTS                     | SP                           | TQML                          | IMT                          | I                             | LE                            | I                          | A                                 | FF                        | AG                              | NEY                       | LV                                  | GE                                   | IFKAS                         |                                  |                              |                             |                            |                                 |                          |                                |                              |                               |                            |                                 |                                      |                            |                             |   |   |   |   |   |   |   |   |   |   |   |
| Rh#066 <i>Macaca fascicularis</i>   | L--H-----S--QGQ-----                 | K                                | I                            | TIG                         | IKNMI                      | NADF                            | STATV                          | LIS                      | FGAVL                      | GKTS                     | SP                           | TQML                          | IMT                          | I                             | E                             | I                          | IAV                               | FAG                       | NEY                             | LV                        | GE                                  | IFKAS                                |                               |                                  |                              |                             |                            |                                 |                          |                                |                              |                               |                            |                                 |                                      |                            |                             |   |   |   |   |   |   |   |   |   |   |   |
| Rh#067 <i>Macaca mulatta</i>        | L--H-----S--QGQ-----                 | K                                | I                            | TIG                         | IKNMI                      | NADF                            | STATV                          | LIS                      | FGAVL                      | GKTS                     | SP                           | TQML                          | IMT                          | I                             | E                             | I                          | IAV                               | FAG                       | NEY                             | LV                        | GE                                  | IFKAS                                |                               |                                  |                              |                             |                            |                                 |                          |                                |                              |                               |                            |                                 |                                      |                            |                             |   |   |   |   |   |   |   |   |   |   |   |
| Rh#068 <i>Pongo pygmaeus</i>        | L--H-----S--QGQ-----                 | K                                | FNIG                         | IKNMI                       | NADF                       | SAA                             | TVL                            | LIS                      | FGAVL                      | GKTS                     | SP                           | TQML                          | IMT                          | I                             | E                             | I                          | A                                 | FF                        | AG                              | NEY                       | LV                                  | GE                                   | IFKAS                         |                                  |                              |                             |                            |                                 |                          |                                |                              |                               |                            |                                 |                                      |                            |                             |   |   |   |   |   |   |   |   |   |   |   |
| Rh#069 <i>Pan troglodytes</i>       | L--Q-----S--QGQ-----                 | K                                | FNIG                         | IKNMI                       | NADF                       | SAA                             | TVL                            | LIS                      | FGAVL                      | GKTS                     | SP                           | TQML                          | IMT                          | I                             | LE                            | I                          | V                                 | FF                        | AH                              | NEY                       | LV                                  | SE                                   | IFKAS                         |                                  |                              |                             |                            |                                 |                          |                                |                              |                               |                            |                                 |                                      |                            |                             |   |   |   |   |   |   |   |   |   |   |   |
| Rh#070 <i>Homo sapiens</i>          | L--Q-----S--QGQ-----                 | K                                | FNIG                         | IKNMI                       | NADF                       | SAA                             | TVL                            | LIS                      | FGAVL                      | GKTS                     | SP                           | TQML                          | IMT                          | I                             | LE                            | I                          | V                                 | FF                        | AH                              | NEY                       | LV                                  | SE                                   | IFKAS                         |                                  |                              |                             |                            |                                 |                          |                                |                              |                               |                            |                                 |                                      |                            |                             |   |   |   |   |   |   |   |   |   |   |   |
| Rh#071 <i>Danio rerio</i>           | F--H-----GM--HGG-----                | K                                | I                            | HV                          | GV                         | TS                              | M                              | NAD                      | FC                         | TG                       | AVL                          | LIS                           | FGAVL                        | GKTS                          | SP                            | V                          | QL                                | LL                        | Y                               | M                         | A                                   | I                                    | LEV                           | T                                | F                            | AV                          | NE                         | I                               | L                        | L                              | S                            | I                             | L                          | G                               | A                                    |                            |                             |   |   |   |   |   |   |   |   |   |   |   |
| Rh#072 <i>Takifugu rubripes</i>     | F--H-----GM--HGG-----                | K                                | I                            | H                           | I                          | G                               | V                              | E                        | S                          | M                        | NAD                          | FC                            | TG                           | S                             | V                             | LIS                        | FGAVL                             | GKTS                      | SP                              | I                         | Q                                   | L                                    | L                             | T                                | M                            | A                           | I                          | F                               | E                        | V                              | T                            | L                             | F                          | A                               | V                                    | N                          | E                           | F | I | L | L | S | L | L | G | T |   |   |
| Rh#073 <i>Oryctolagus cuniculus</i> | L--H-----S--HGG-----                 | H                                | I                            | H                           | V                          | G                               | M                              | E                        | S                          | L                        | NAD                          | FC                            | A                            | G                             | A                             | V                          | LIS                               | FGAVL                     | GKTS                            | G                         | P                                   | A                                    | Q                             | L                                | L                            | L                           | M                          | A                               | L                        | L                              | E                            | A                             | V                          | L                               | F                                    | G                          | L                           | N | E | F | V | L | L | C | L | L | G | V |
| Rh#074 <i>Oryzias latipes</i>       | Rh#075 <i>Tetraodon nigroviridis</i> | Rh#076 <i>Xenopus tropicalis</i> | Rh#077 <i>Xenopus laevis</i> | Rh#078 <i>Gallus gallus</i> | Rh#079 <i>Mus musculus</i> | Rh#080 <i>Rattus norvegicus</i> | Rh#081 <i>Canis familiaris</i> | Rh#082 <i>Bos taurus</i> | Rh#083 <i>Hylobates sp</i> | Rh#084 <i>Sus scrofa</i> | Rh#085 <i>Macaca mulatta</i> | Rh#086 <i>Papio hamadryas</i> | Rh#087 <i>Pongo pygmaeus</i> | Rh#088 <i>Gorilla gorilla</i> | Rh#089 <i>Pan troglodytes</i> | Rh#090 <i>Homo sapiens</i> | Rh#091 <i>Oncorhynchus mykiss</i> | Rh#092 <i>Danio rerio</i> | Rh#093 <i>Takifugu rubripes</i> | Rh#094 <i>Danio rerio</i> | Rh#095 <i>Oryctolagus cuniculus</i> | Rh#096 <i>Tetraodon nigroviridis</i> | Rh#097 <i>Oryzias latipes</i> | Rh#098 <i>Xenopus tropicalis</i> | Rh#099 <i>Xenopus laevis</i> | Rh#100 <i>Gallus gallus</i> | Rh#101 <i>Mus musculus</i> | Rh#102 <i>Rattus norvegicus</i> | Rh#103 <i>Bos taurus</i> | Rh#104 <i>Canis familiaris</i> | Rh#105 <i>Pongo pygmaeus</i> | Rh#106 <i>Pan troglodytes</i> | Rh#107 <i>Homo sapiens</i> | Rh#108 <i>Takifugu rubripes</i> | Rh#109 <i>Tetraodon nigroviridis</i> | Rh#110 <i>Homo sapiens</i> | Rh#111 <i>Gallus gallus</i> |   |   |   |   |   |   |   |   |   |   |   |





|                                      | 170                 | 180                                     | 190         | 200     | 210           | 220                                             | 230             |               |                       |
|--------------------------------------|---------------------|-----------------------------------------|-------------|---------|---------------|-------------------------------------------------|-----------------|---------------|-----------------------|
| Rh#060 <i>Rattus norvegicus</i>      | D T G A             | S M T I H A F G A Y F G L A V A G V L Y | --- R S G L | --- K H | --- G H P N   | E E S V Y H S D L F A M I G T L F L W M F W P S | --- F N S A I A | --- Q P E N N | --- Q Y R A I V N T Y |
| Rh#061 <i>Bos taurus</i>             | D I T G E           | S M T I H A F G A Y F G L A V A G I L Y | --- R S G L | --- K E | --- K H S N   | E E S V Y H S D L F A M I G S L F L W I F W P S | --- F N S A I A | --- D E A K K | --- Q Y R A I V N T Y |
| Rh#062 <i>Canis familiaris</i>       | D I G A             | S M T I H A F G A Y F G L A V A G V L Y | --- R T G L | --- R K | --- G H E K   | E E S E Y H S D L F A M I G T L F L W M F W P S | --- F N S A I A | --- E T A E E | --- Q Y L A I N T Y   |
| Rh#063 <i>Cebus apella</i>           | D I G A             | S M T I H A F G A Y F G L A V A G I L Y | --- R S G L | --- R R | --- G H E N   | E E S V Y H S D L F A M I G T L F L W M F W P S | --- F N S A I A | --- E P G D K | --- Q Y R A I V N T Y |
| Rh#064 <i>Gorilla gorilla</i>        | D I G A             | S M T I H A F G A Y F G L A V A G I L Y | --- R S G L | --- R K | --- G H K N   | E E S A Y Y S D L F A M I G T L F L W M F W P S | --- F N S A I A | --- E P G E K | --- Q C K A I V N T Y |
| Rh#065 <i>Hylobates sp</i>           | D I G A             | S M T I H A F G A Y F G L A V A G I L Y | --- R S G L | --- R R | --- G H K N   | E E S T Y C S D L F A M I G T L F L W F W P S   | --- F N S A I A | --- E P G D K | --- Q C R A I V N T Y |
| Rh#066 <i>Macaca fascicularis</i>    | D I G A             | S M T I H A F G A Y F G L A V A G I L Y | --- R S A L | --- R R | --- G H K N   | E E S T Y Y S D L F A M I G T L F L W M F W P S | --- F N S A I A | --- E P G D K | --- Q S R A I V N T Y |
| Rh#067 <i>Macaca mulatta</i>         | D I G A             | S M T I H A F G A Y F G L A V A G I L Y | --- R S A L | --- R R | --- G H K N   | E E S A Y Y S D L F A M I G T L F L W M F W P S | --- F N S A I A | --- E P G D K | --- Q S R A I V N T Y |
| Rh#068 <i>Pongo pygmaeus</i>         | D I G A             | S M T I H A F G A Y F G L A V A G I L Y | --- R S G L | --- R R | --- R H K N   | E E S A Y Y S D L F A M I G T L F L W M F W P S | --- F N S A I A | --- E P G D K | --- Q C R A I V N T Y |
| Rh#069 <i>Pan troglodytes</i>        | D I G A             | S M T I H A F G A Y F G L A V A G I L Y | --- R S G L | --- R K | --- G H D N   | E E S A Y Y S D L F A M I G T L F L W M F W P S | --- F N S A I A | --- E P G E K | --- Q G R A I V N T Y |
| Rh#070 <i>Homo sapiens</i>           | D I G A             | S M T I H A F G A Y F G L A V A G I L Y | --- R S G L | --- R K | --- G H E N   | E E S A Y Y S D L F A M I G T L F L W M F W P S | --- F N S A I A | --- E P G D K | --- Q C R A I V N T Y |
| Rh#071 <i>Danio rerio</i>            | D A G G S           | M T I H T F G A Y F G L M V T R I L H   | --- R P N L | --- D K | --- S K H K   | N S S V Y H S D L F A M I G T I F L W M F W P S | --- F N S A I T | --- Q Y G D P | --- Q H R T A A N T Y |
| Rh#072 <i>Takifugu rubripes</i>      | D A G G S           | M T I H T F G A Y F G L M V T R I L Y   | --- R P N L | --- D K | --- S K H R   | N S S V Y H S D L F A M I G T V Y L W M F W P S | --- F N S A I T | --- A H G D D | --- Q H R T A L N T Y |
| Rh#073 <i>Oryctolagus cuniculus</i>  | D A G G S           | M T I H T F G A Y F G L V L S R V L Y   | --- R P H L | --- E K | --- S Q H R   | Q G S V Y H S D L F A M I G T I F L W I F W P S | --- F N S A L T | --- S R G D G | --- Q P R T A L N T Y |
| Rh#074 <i>Oryzias latipes</i>        | D A G G S           | M T I H T F G A Y F G L M V T R I L Y   | --- R P N L | --- D K | --- S K H K   | N C S V Y H S D L F A M I G T L Y L W M F W P S | --- F N S A V T | --- E H G D P | --- Q H R T A M N T Y |
| Rh#075 <i>Tetraodon nigroviridis</i> | D A G G S           | M T I H T F G A Y F G L M V T R I L Y   | --- R P H L | --- D K | --- S K H R   | N C S V Y H S D L F A M I G T I Y L W M F W P S | --- F N S A I T | --- A H G D D | --- Q H R T A L N T Y |
| Rh#076 <i>Xenopus tropicalis</i>     | D A G G S           | M T I H T F G A Y F G L I V S R V L Y   | --- R D D L | --- E K | --- S R Q R   | E G S V Y H S D L F A M I G T I Y L W M F W P S | --- F N S A I T | --- A H G D D | --- Q H R T V M N T Y |
| Rh#077 <i>Xenopus laevis</i>         | D A G G S           | M T I H T F G A Y F G L I V S R V L Y   | --- R A D L | --- D K | --- S R Q R   | E G S V Y H S D L F A M I G T I Y L W M F W P S | --- F N S A V T | --- A H G D D | --- Q H R T V L N T Y |
| Rh#078 <i>Gallus gallus</i>          | D S G G S           | L T I H T F G A Y F G L T V S R A L H   | --- Q P H E | --- D K | --- R K E Q   | Q D V G H G P D V F A V V G T I C L W I F W P S | --- F A S A T T | --- A H D S A | --- P W A V L N L Y   |
| Rh#079 <i>Mus musculus</i>           | D A G G S           | M T I H T F G A Y F G L F L S R V L Y   | --- R S Q L | --- E K | --- S R H R   | Q T S V Y N S D L F A M I G T I F L W F W P S   | --- F N S A P T | --- A L G D G | --- Q H R T V V N T Y |
| Rh#080 <i>Rattus norvegicus</i>      | D A G G S           | M T I H T F G A Y F G L F L S R V L Y   | --- R S Q L | --- E K | --- S R H R   | Q T S V Y N S D L F A M I G T I F L W F W P S   | --- F N S A P T | --- A L G D G | --- Q H R T V V N T Y |
| Rh#081 <i>Canis familiaris</i>       | D A G G S           | M T I H T F G A Y F G L V L S R V L Y   | --- R P Q L | --- E K | --- S K H R   | Q C S V Y H S D L F A M I G T I F L W I F W P S | --- F N S A P T | --- T L G D G | --- Q H R T A L N T Y |
| Rh#082 <i>Bos taurus</i>             | D A G G S           | M T I H T F G A Y F G L I L S R V L Y   | --- R P Q L | --- E K | --- H R Q     | G S V Y H S D L F A M I G T I F L W I F W P S   | --- F N S A P T | --- A L G D G | --- Q H R T A L N T Y |
| Rh#083 <i>Hylobates sp</i>           | D A R G S           | M T I H T F G A Y F R L V L S W L Y     | --- R P Q L | --- E K | --- S K N R   | Q G S V Y H S D L F A M I G T I F L W I F W P S | --- F N A A L T | --- A L G A G | --- Q H R T A L N T Y |
| Rh#084 <i>Sus scrofa</i>             | D A G G S           | M T I H T F G A Y F G L V L S R V L Y   | --- R P Q L | --- E K | --- S K H R   | Q S S V Y H S D L F A M I G T I F L W I F W P S | --- F N S A P T | --- P L G D G | --- Q H R T A L N T Y |
| Rh#085 <i>Macaca mulatta</i>         | D A G G S           | M T I H T F G A Y F G L V L S R V L Y   | --- R P Q L | --- E K | --- S K H R   | Q G S V Y H S D L F A M I G T I F L W I F W P S | --- F N S A L T | --- A L G A G | --- Q H R T A L N T Y |
| Rh#086 <i>Papio hamadryas</i>        | D A G G S           | M T I H T F G A Y F G L V L S R V L Y   | --- R P Q L | --- E K | --- S K H R   | Q G S V Y H S D L F A M I G T I F L W I F W P S | --- F N S A L T | --- A L G A G | --- Q H R T A L N T Y |
| Rh#087 <i>Pongo pygmaeus</i>         | D A G G S           | M T I H T F G A Y F G L V L S Q V L Y   | --- R P Q L | --- E K | --- S K H R   | N G Q L Y H S D L F A M I G T I F L W I F W P S | --- F N A A L T | --- S L G A G | --- Q H R T A L N T Y |
| Rh#088 <i>Gorilla gorilla</i>        | D A G G S           | M T I H T F G A Y F G L V L S R V L Y   | --- R P Q L | --- E K | --- S K H R   | Q G S V Y H S D L F T M I G T I F L W I F W P S | --- F N A A L T | --- A L G A G | --- Q H R T A L N T Y |
| Rh#089 <i>Pan troglodytes</i>        | D A G G S           | M T I H T F G A Y F G L V L S R V L Y   | --- R P Q L | --- E K | --- S K H R   | Q G S V Y H S D L F A M I G T I F L W I F W P S | --- F N A A L T | --- A L G A G | --- Q H R T A L N T Y |
| Rh#090 <i>Homo sapiens</i>           | D A G G S           | M T I H T F G A Y F G L V L S R V L Y   | --- R P Q L | --- E K | --- S K H R   | Q G S V Y H S D L F A M I G T I F L W I F W P S | --- F N A A L T | --- A L G A G | --- Q H R T A L N T Y |
| Rh#091 <i>Oncorhynchus mykiss</i>    | D A G G S           | M V I H T F G G Y Y G L T I S W L Y     | --- R P N L | --- H Q | --- S K R M   | Q G S V Y H S D I F A M I G T L F L W M F W P S | --- F N S A I T | --- D H G D G | --- Q H R A V I N T Y |
| Rh#092 <i>Danio rerio</i>            | D A G G S           | M V I H T F G A Y Y G L S I S R V L Y   | --- R P N L | --- N K | --- S K H M   | N G S V Y H S D V F A M I G T L F L W M F W P S | --- F N S A I C | --- N H G D G | --- Q H R A A I N T Y |
| Rh#093 <i>Takifugu rubripes</i>      | D A G G S           | M V I H A F G G Y Y G L G I S W L Y     | --- R P N L | --- H Q | --- S K R L   | H G S V Y H S D V F A M I G T L F L W M F W P S | --- F N S A I T | --- D H G D G | --- Q H R A A I N T Y |
| Rh#094 <i>Danio rerio</i>            | D A G G S           | M V I H T F G A Y Y G L T I S W L Y     | --- R P F L | --- S Q | --- S N H L   | Q R S V Y H S D V F A M I G T L F L W M F W P S | --- F N S A I A | --- D H G D G | --- Q H R A A I N T Y |
| Rh#095 <i>Oryctolagus cuniculus</i>  | D A G G S           | I T I H T F G A Y F G L T V T W I L Y   | --- R H N L | --- D H | --- S R E R   | Q S S V Y H S N L F A M I G T L F L W I Y W P S | --- F N S A M S | --- N Y G D A | --- Q H R A A I N T Y |
| Rh#096 <i>Tetraodon nigroviridis</i> | D A G G S           | M V I H T F G G Y Y G L S I S W M L Y   | --- R P N L | --- E Q | --- S S N L   | Q G S V Y Q S D V F A M I G T L F L W M F W P S | --- F N S A I T | --- D H G D G | --- Q H R A A I N T Y |
| Rh#097 <i>Oryzias latipes</i>        | D S G G A           | M V I H C F G G Y Y G L A I S W L Y     | --- R P N L | --- H R | --- S K R L   | N G S V Y H S D L F A M I G T L F L W M F W P S | --- F N S A I A | --- N H G D G | --- Q H R T A M N T Y |
| Rh#098 <i>Xenopus tropicalis</i>     | D A G G S           | M T I H T F G A Y F G L T V A W I L N   | --- R P R L | --- K Q | --- T N D K   | E G S V Y S D L F S M I G T L F L W M F W P S   | --- F N S A V S | --- Y H G D A | --- Q H R A A I N T Y |
| Rh#099 <i>Xenopus laevis</i>         | D A G G S           | M T I H T F G A Y F G L T V A W I L S   | --- R P K L | --- K Q | --- N N D K   | E G S T Y I S D L F S M I G T L F L W M Y W P S | --- F N S A I S | --- Y H G D A | --- Q H R A A I N T Y |
| Rh#100 <i>Gallus gallus</i>          | D A G G S           | M T I H T F G A Y F G L T V T R F L Y   | --- R P N L | --- E Q | --- S K D K   | E G S V Y H S D L F A M I G T L Y L W M Y W P S | --- F N S A I S | --- E H G D A | --- Q H R A A I N T Y |
| Rh#101 <i>Mus musculus</i>           | D A G G S           | M T I H T F G A Y F G L T V T W I L Y   | --- R K N L | --- D Q | --- S K Q R   | Q S S V Y H S D L F A M I G T L F L W I Y W P S | --- F N S A S S | --- F H G D A | --- Q H R A A L N T Y |
| Rh#102 <i>Rattus norvegicus</i>      | D A G G S           | M T I H T F G A Y F G L T V T W I L Y   | --- R K N L | --- E Q | --- S K Q R   | Q S S V Y H S D L F A M I G T L F L W I Y W P S | --- F N S A S S | --- F H G D T | --- Q H R A A L N T Y |
| Rh#103 <i>Bos taurus</i>             | D S G G S           | M T I H A F G A Y F G L T V A W I L Y   | --- R P N L | --- H L | --- S K E R   | Q S S T Y H S D L F A M I G T L F L W M Y W P S | --- F N S A I S | --- N H G D A | --- Q H R A A I N T Y |
| Rh#104 <i>Canis familiaris</i>       | D A G G S           | M T I H T F G A Y F G L T V T W I L Y   | --- R P G L | --- H Q | --- S K E R   | Q S S V Y H S D L F A M I G T L F L W M Y W P S | --- F N S A V S | --- N H G D A | --- Q H R A A I N T Y |
| Rh#105 <i>Pongo pygmaeus</i>         | D A G G S           | M T I H T F G A Y F G L T V T R I L Y   | --- R R N L | --- E Q | --- S K E R   | Q N S V Y Q S D L F A M I G T L F L W M Y W P S | --- F N S A I S | --- Y H G D S | --- Q H R A A I N T Y |
| Rh#106 <i>Pan troglodytes</i>        | D A G G S           | M T I H T F G A Y F G L T V T R I L Y   | --- R R N L | --- E Q | --- S K E R   | Q N S V Y Q S D L F A M I G T L F L W M Y W P S | --- F N S A I S | --- Y H G D S | --- Q H R A A I N T Y |
| Rh#107 <i>Homo sapiens</i>           | D A G G S           | M T I H T F G A Y F G L T V T R I L Y   | --- R R N L | --- E Q | --- S K E R   | Q N S V Y Q S D L F A M I G T L F L W M Y W P S | --- F N S A I S | --- Y H G D S | --- Q H R A A I N T Y |
| Rh#108 <i>Takifugu rubripes</i>      | D A G G S           | M V I H T F G G Y Y G L S I S W M L Y   | --- R P N L | --- D Q | --- S S N L   | Q G S V Y H S D V F A M I G T L F L W M F W P S | --- F N S A I T | --- D H G D G | --- Q H R A A I N T Y |
| Rh#109 <i>Tetraodon nigroviridis</i> | D A G G S           | M V I H A F G G Y Y G L A I S W L Y     | --- R P N L | --- H Q | --- S K R L   | N G S V Y H S D V F A M I G T L F L W M F W P S | --- F N S A I T | --- D H G D G | --- Q H R A A I N T Y |
| Rh#110 <i>Homo sapiens</i>           | Y H M N M M H       | I Y V F A A Y F G L S V A W C L P       | --- K P L   | --- P E | --- G T E D K | D Q T A T I P S L S A M L G A L F L W M F W P S | --- F N S A L T | --- R S P I E | --- R K N A V I N T Y |
| Rh#111 <i>Gallus gallus</i>          | S H V S M M H V H L | F G A Y F G L A V S S R F S             | --- E P S P | --- R S | --- E K N     | --- A S T P R S D L L S M L G T L F L W F W P S | --- F N S V L A | --- V E K     | --- D R A I F N T C   |







|                                          | 340     |           |                | 350 | 360 | 370 | 380 |
|------------------------------------------|---------|-----------|----------------|-----|-----|-----|-----|
| Rh#001.1 <i>Nitrosomonas europaea</i>    | SA      | ILIVP     | -GIA           |     |     |     |     |
| Rh#001.2 <i>Nitrosospora multiformis</i> | VAVLVVP | -GIA      |                |     |     |     |     |
| Rh#001.3 <i>Acidobacteria bacterium</i>  | IA      | IVVIP     | -GIA           |     |     |     |     |
| Rh#001.4 <i>Candidatus Kueningenia</i>   | AA      | IFMAGSAVP |                |     |     |     |     |
| Rh#002 <i>Danio rerio</i>                | AG      | ICAIL     | -LATEETYGP     |     |     |     |     |
| Rh#003 <i>Takifugu rubripes</i>          | AG      | ICAIL     | -LANEETYGP     |     |     |     |     |
| Rh#004 <i>Takifugu rubripes</i>          | AG      | ICAIL     | -MAREEDYGP     |     |     |     |     |
| Rh#005 <i>Takifugu rubripes</i>          | AG      | ICAIL     | -MAREEDYGP     |     |     |     |     |
| Rh#006 <i>Tetraodon nigroviridis</i>     | AG      | ICAIL     | -LAKEETYGP     |     |     |     |     |
| Rh#007 <i>Xenopus tropicalis</i>         | GS      | ILAIL     | -LDRVDTGGH     |     |     |     |     |
| Rh#008 <i>Chlamydomonas reinhardtii</i>  | VAGLAA  | L         | GQHPDYLEHDTG   |     |     |     |     |
| Rh#009 <i>Chlamydomonas reinhardtii</i>  | VAGLAA  | L         | GQHSYDLEHDTG   |     |     |     |     |
| Rh#010 <i>Apis mellifera</i>             | FAGLMAA | L         | ATEASYDY       |     |     |     |     |
| Rh#011 <i>Dictyostelium discoideum</i>   | AA      | IFAAI     | -KGLNPN        |     |     |     |     |
| Rh#012 <i>Dictyostelium discoideum</i>   | AAC     | IAAW      | -KGLNDRSLYN    |     |     |     |     |
| Rh#013 <i>Geodia cydonium</i>            | GS      | FVAAY     | -LASYSGGGNRIEY |     |     |     |     |
| Rh#014 <i>Caenorhabditis elegans</i>     | LS      | IGFAY     | -FYEPESYG      |     |     |     |     |
| Rh#015 <i>Caenorhabditis briggsae</i>    | LS      | IGFAY     | -FYEPESYG      |     |     |     |     |
| Rh#016 <i>Caenorhabditis elegans</i>     | AS      | IAFLF     | -IYDETRYP      |     |     |     |     |
| Rh#017 <i>Caenorhabditis briggsae</i>    | AS      | IAFLF     | -IYDESQYP      |     |     |     |     |
| Rh#018 <i>Ciona intestinalis</i>         | AAVV    | FAK       | -LTTATTTYTD    |     |     |     |     |
| Rh#019 <i>Ciona intestinalis</i>         | ASA     | IAAA      | -IATQETKYD     |     |     |     |     |
| Rh#020 <i>Ciona intestinalis</i>         | ISA     | IVAT      | -IATKDAYQD     |     |     |     |     |
| Rh#021 <i>Carcinus maenas</i>            | IG      | AVAAA     | -LASEATYGL     |     |     |     |     |
| Rh#022 <i>Anopheles gambiae</i>          | FSA     | IYAS      | -FASVETYG      |     |     |     |     |
| Rh#023 <i>Drosophila pseudoobscura</i>   | ASA     | IYAS      | -MASLDDYQS     |     |     |     |     |
| Rh#024 <i>Drosophila melanogaster</i>    | ASA     | IYAS      | -MATVGEYQS     |     |     |     |     |
| Rh#025 <i>Ciona savignyi</i>             | ASA     | IAAA      | -VADRASYQD     |     |     |     |     |
| Rh#026 <i>Ciona savignyi</i>             | ISA     | IAIA      | -LANKAAYQD     |     |     |     |     |
| Rh#027 <i>Ciona savignyi</i>             | AAV     | IAK       | -ATSPTTYTT     |     |     |     |     |
| Rh#028 <i>Drosophila yakuba</i>          | ASA     | IYAS      | -MVTVGEYQS     |     |     |     |     |
| Rh#029 <i>Danio rerio</i>                | AHLC    | LRL       | -ASMEG         |     |     |     |     |
| Rh#030 <i>Salmo salar</i>                | VQL     | LLQI      | -ADSDDLTT      |     |     |     |     |
| Rh#031 <i>Takifugu rubripes</i>          | AH      | LLLQI     | -QACDDPTT      |     |     |     |     |
| Rh#032 <i>Tetraodon nigroviridis</i>     | AH      | LLLQL     | -WDSEDHT       |     |     |     |     |
| Rh#033 <i>Xenopus laevis</i>             | TY      | VVLIV     | -TADFTSTA      |     |     |     |     |
| Rh#034 <i>Xenopus tropicalis</i>         | TY      | VILII     | -TADFRSTA      |     |     |     |     |
| Rh#035 <i>Gallus gallus</i>              | AE      | VFFV      | -MDIQTCLP      |     |     |     |     |
| Rh#036 <i>Mus musculus</i>               | TY      | YCLQI     | -VTEPKSS       |     |     |     |     |
| Rh#037 <i>Oncorhynchus mykiss</i>        | VQ      | LLLQI     | -ADSDDLTT      |     |     |     |     |
| Rh#038 <i>Rattus norvegicus</i>          | TY      | YCLHI     | -IAESRPSN      |     |     |     |     |
| Rh#039 <i>Bos taurus</i>                 | VN      | IMLMA     | -LQAQGVDKS     |     |     |     |     |
| Rh#040 <i>Callithrix jacchus</i>         | TY      | IVLMM     | -HQA VWAN      |     |     |     |     |
| Rh#041 <i>Canis familiaris</i>           | VY      | ILLMF     | -YEV TWTKN     |     |     |     |     |
| Rh#042 <i>Cebus apella</i>               | TY      | IALMM     | -HQA VWAN      |     |     |     |     |
| Rh#043 <i>Macaca fascicularis</i>        | TY      | IVLMA     | -LRVFWASSN     |     |     |     |     |
| Rh#044 <i>Macaca mulatta</i>             | TY      | IVLMA     | -LRVVWASSN     |     |     |     |     |
| Rh#045 <i>Sus scrofa</i>                 | ID      | IVLKA     | -LQVKWTEVS     |     |     |     |     |
| Rh#046 <i>Gorilla gorilla</i>            | IY      | IVLLV     | -LDTVGA GNG    |     |     |     |     |
| Rh#047 <i>Papio papio</i>                | TC      | IVLMA     | -LRVVWASSN     |     |     |     |     |
| Rh#048 <i>Pongo pygmaeus</i>             | TY      | IVLVV     | -LRTVWAG       |     |     |     |     |
| Rh#049 <i>Pan troglodytes</i>            | IY      | IVLLV     | -HHTVWNGG      |     |     |     |     |
| Rh#050 <i>Homo sapiens</i>               | TY      | IVLLV     | -LHTVWNGG      |     |     |     |     |
| Rh#051 <i>Papio hamadryas</i>            | AG      | IAAVA     | -LGASNTS       |     |     |     |     |
| Rh#052 <i>Takifugu rubripes</i>          | AG      | IVAVA     | -MGKKDGG       |     |     |     |     |
| Rh#053 <i>Danio rerio</i>                | AG      | ILAAA     | -LKRKEGV       |     |     |     |     |
| Rh#054 <i>Tetraodon nigroviridis</i>     | AG      | IVAVA     | -LGKKDGG       |     |     |     |     |
| Rh#055 <i>Ambystoma tigrinum</i>         | AG      | IVAAM     | -LGAKEGA       |     |     |     |     |
| Rh#056 <i>Xenopus laevis</i>             | AG      | IVSAA     | -VGAKEGC       |     |     |     |     |
| Rh#057 <i>Xenopus tropicalis</i>         | AG      | IVAAA     | -IGAKEGC       |     |     |     |     |
| Rh#058 <i>Gallus gallus</i>              | AS      | IVVTA     | -TQPE TKG      |     |     |     |     |
| Rh#059 <i>Mus musculus</i>               | AS      | IVAA      | -ISWGMS TAS    |     |     |     |     |





|                                            | 390      | 400                                   | 410                      | 420                 |              |              |            |       |             |        |          |       |      |      |        |      |        |       |   |   |   |   |   |   |   |   |   |   |   |  |
|--------------------------------------------|----------|---------------------------------------|--------------------------|---------------------|--------------|--------------|------------|-------|-------------|--------|----------|-------|------|------|--------|------|--------|-------|---|---|---|---|---|---|---|---|---|---|---|--|
| Rh#001.1 <i>Nitrosomonas europaea</i>      | SHEFIHLA | GPEDEHKAERLVLEAKTEIQGLKNRIDAAVLSAKSEG |                          |                     |              |              |            |       |             |        |          |       |      |      |        |      |        |       |   |   |   |   |   |   |   |   |   |   |   |  |
| Rh#001.2 <i>Nitrosospora multififormis</i> | SEEFTHTE | GPE-ATEIEAIVLEGETST                   |                          |                     |              |              |            |       |             |        |          |       |      |      |        |      |        |       |   |   |   |   |   |   |   |   |   |   |   |  |
| Rh#001.3 <i>Acidobacteria bacterium</i>    | REEFA    | GAD                                   |                          |                     |              |              |            |       |             |        |          |       |      |      |        |      |        |       |   |   |   |   |   |   |   |   |   |   |   |  |
| Rh#001.4 <i>Candidatus Kuenenia</i>        | EEE      | FVVEAH                                |                          |                     |              |              |            |       |             |        |          |       |      |      |        |      |        |       |   |   |   |   |   |   |   |   |   |   |   |  |
| Rh#002 <i>Danio rerio</i>                  | FDDEV    | FFTVPSDYDCVNVLSE                      | TSKAENE                  |                     |              |              |            |       |             |        |          |       |      |      |        |      |        |       |   |   |   |   |   |   |   |   |   |   |   |  |
| Rh#003 <i>Takifugu rubripes</i>            | FDDEL    | FFDLPPDAGTTALSDTKIFD                  | GK LKMNSV                |                     |              |              |            |       |             |        |          |       |      |      |        |      |        |       |   |   |   |   |   |   |   |   |   |   |   |  |
| Rh#004 <i>Takifugu rubripes</i>            | YDDEL    | FFEVPPDYDSP LQLNNLVSP                 | EDSAV                    |                     |              |              |            |       |             |        |          |       |      |      |        |      |        |       |   |   |   |   |   |   |   |   |   |   |   |  |
| Rh#005 <i>Takifugu rubripes</i>            | YDDEL    | FFEVPPDYDSP LQLNNLVSP                 | EDSAV                    |                     |              |              |            |       |             |        |          |       |      |      |        |      |        |       |   |   |   |   |   |   |   |   |   |   |   |  |
| Rh#006 <i>Tetraodon nigroviridis</i>       | FDDEL    | FFGFDDDELSS                           | TCHL TSA                 |                     |              |              |            |       |             |        |          |       |      |      |        |      |        |       |   |   |   |   |   |   |   |   |   |   |   |  |
| Rh#007 <i>Xenopus tropicalis</i>           | FDDQPY   | FQIPIDSEEKWSLNP                       | KAQRELLVPLKQV            |                     |              |              |            |       |             |        |          |       |      |      |        |      |        |       |   |   |   |   |   |   |   |   |   |   |   |  |
| Rh#008 <i>Chlamydomonas reinhardtii</i>    | FDDGP    | WWEHQRVEPMP                           | ISTSIHLNSMSAHGKSHHNQSVSV | GQLNPIREGREIAVSGVPA | TGQRSVGEIAV  | TMQAAPVMASSA | PVMGMHAAAA | TPIDT | PLFAD       | GHAM   |          |       |      |      |        |      |        |       |   |   |   |   |   |   |   |   |   |   |   |  |
| Rh#009 <i>Chlamydomonas reinhardtii</i>    | FDDGP    | WWWGQRVEPMP                           | ISTSIHLSTLNSRHQKDGGS     | TQRGNAAANASVSMANTLV | PNPAEP       | RRHGSACPAAP  | IAVSGV     | PA    | AAVAHHS     | LTVSG  | QQGA     | AHG   | AAAA | SE   | IVA    |      |        |       |   |   |   |   |   |   |   |   |   |   |   |  |
| Rh#010 <i>Apis mellifera</i>               | FDDEA    | HWLEEE                                | LQGS                     | IKESNSCSNDQL        | PMGHM        |              |            |       |             |        |          |       |      |      |        |      |        |       |   |   |   |   |   |   |   |   |   |   |   |  |
| Rh#011 <i>Dictyostelium discoideum</i>     | YQDSA    | FWILPIDY                              | PKDVA                    | TVVALNNAATSEDTAG    | GGDDEEE      | GVGKEH       | GAVEMGKHNR | IVQ   | PKQDNKYHKQL | PSDDEE | EEDE     | FKQE  | PI   |      |        |      |        |       |   |   |   |   |   |   |   |   |   |   |   |  |
| Rh#012 <i>Dictyostelium discoideum</i>     | YQDSA    | FWHVPIDY                              | PKDVEYVVEQNNLP           | MPTTDN              | GDNVVGGGVEMK | KNHNNNNNNK   | KENGYRRDL  | IRLLE | TLVRNEQS    | TDSSYS | SDSSDDEE | EKERR | IRK  | LAKK | SYRRS  |      |        |       |   |   |   |   |   |   |   |   |   |   |   |  |
| Rh#013 <i>Geodia cydonium</i>              | FDDQI    | YWE                                   | LDDADKYLP                | IEELSR              | SRIE         | IAIGLRH      | GV         | PA    | ADS         | PP     | VS       | GE    | TG   | QQ   | TNEENK | QETS | I      |       |   |   |   |   |   |   |   |   |   |   |   |  |
| Rh#014 <i>Caenorhabditis elegans</i>       | PHGEM    | NYYAQSDVN                             | FLSKYKHAQE               | QERLRERE            | QMQE         | IY           |            |       |             |        |          |       |      |      |        |      |        |       |   |   |   |   |   |   |   |   |   |   |   |  |
| Rh#015 <i>Caenorhabditis briggsae</i>      | PHGEM    | NYYAQSDVN                             | FLSKYKHAQE               | QRLRERE             | QMHE         | IY           |            |       |             |        |          |       |      |      |        |      |        |       |   |   |   |   |   |   |   |   |   |   |   |  |
| Rh#016 <i>Caenorhabditis elegans</i>       | YADGDY   | FE                                    | TPGDYD                   | FTSRIV              | TSVKQIE      | VAEYNP       | LSQKEV     |       |             |        |          |       |      |      |        |      |        |       |   |   |   |   |   |   |   |   |   |   |   |  |
| Rh#017 <i>Caenorhabditis briggsae</i>      | YADGDY   | FE                                    | TPGDYD                   | FTSRIV              | TSVKQIE      | VAEYNP       | LSQKEV     |       |             |        |          |       |      |      |        |      |        |       |   |   |   |   |   |   |   |   |   |   |   |  |
| Rh#018 <i>Ciona intestinalis</i>           | TKKAL    | VE                                    | QTS                      | DNNDQVVEE           | VQTS         | ST           |            |       |             |        |          |       |      |      |        |      |        |       |   |   |   |   |   |   |   |   |   |   |   |  |
| Rh#019 <i>Ciona intestinalis</i>           | FEDEV    | FWDC                                  | VE                       | TVSE                | EAEQNGS      | NDKQHE       | VVAT       |       |             |        |          |       |      |      |        |      |        |       |   |   |   |   |   |   |   |   |   |   |   |  |
| Rh#020 <i>Ciona intestinalis</i>           | FEDEV    | FW                                    | DV                       | SGS                 |              |              |            |       |             |        |          |       |      |      |        |      |        |       |   |   |   |   |   |   |   |   |   |   |   |  |
| Rh#021 <i>Carcinus maenas</i>              | YEDK     | WWM                                   | ME                       | SE                  | EDE          | GK           | GS         | VSI   | P           | MADN   | GAR      |       |      |      |        |      |        |       |   |   |   |   |   |   |   |   |   |   |   |  |
| Rh#022 <i>Anopheles gambiae</i>            | HKDDA    | FWE                                   | TP                       | SE                  | ESTNTT       | ITT          | NESSN      |       |             |        |          |       |      |      |        |      |        |       |   |   |   |   |   |   |   |   |   |   |   |  |
| Rh#023 <i>Drosophila pseudoobscura</i>     | HQDE     | QYWE                                  | VPA                      | LDN                 | KEE          |              |            |       |             |        |          |       |      |      |        |      |        |       |   |   |   |   |   |   |   |   |   |   |   |  |
| Rh#024 <i>Drosophila melanogaster</i>      | HQDE     | HYWE                                  | VPA                      | AEN                 | KEE          |              |            |       |             |        |          |       |      |      |        |      |        |       |   |   |   |   |   |   |   |   |   |   |   |  |
| Rh#025 <i>Ciona savignyi</i>               | FEDEV    | FW                                    | CE                       | GD                  | WN           | QESQND       | TNGVEK     | GGE   | VSA         | LA     |          |       |      |      |        |      |        |       |   |   |   |   |   |   |   |   |   |   |   |  |
| Rh#026 <i>Ciona savignyi</i>               | FEDEV    | FW                                    | CP                       | QA                  | ES           | DD           | TD         | NER   | EV          | LAG    | K        | ST    | A    | T    | A      | S    | A      |       |   |   |   |   |   |   |   |   |   |   |   |  |
| Rh#027 <i>Ciona savignyi</i>               | FDDR     | P                                     | YWN                      | LE                  | SE           | ESND         | I          | P     | MKN         | L      | Q        | Q     | E    | P    | TRKS   | LV   | LHHLYC | NCNVN |   |   |   |   |   |   |   |   |   |   |   |  |
| Rh#028 <i>Drosophila yakuba</i>            | HQDE     | HYWE                                  | VPA                      | AEN                 | KEE          |              |            |       |             |        |          |       |      |      |        |      |        |       |   |   |   |   |   |   |   |   |   |   |   |  |
| Rh#029 <i>Danio rerio</i>                  | FDDQA    | FWE                                   | FP                       | N                   | LV           | TKK          |            |       |             |        |          |       |      |      |        |      |        |       |   |   |   |   |   |   |   |   |   |   |   |  |
| Rh#030 <i>Salmo salar</i>                  | FDDQA    | FWD                                   | FP                       | H                   | L            | GG           | K          | N     |             |        |          |       |      |      |        |      |        |       |   |   |   |   |   |   |   |   |   |   |   |  |
| Rh#031 <i>Takifugu rubripes</i>            | FDDQA    | FWE                                   | FP                       | H                   | L            | A            | V          | G     | K           |        |          |       |      |      |        |      |        |       |   |   |   |   |   |   |   |   |   |   |   |  |
| Rh#032 <i>Tetraodon nigroviridis</i>       | FDDQA    | FWE                                   | FP                       | H                   | L            | A            | V          | R     | K           |        |          |       |      |      |        |      |        |       |   |   |   |   |   |   |   |   |   |   |   |  |
| Rh#033 <i>Xenopus laevis</i>               | FHDQP    | YWE                                   | FP                       | H                   | L            | A            | S          | H     | L           |        |          |       |      |      |        |      |        |       |   |   |   |   |   |   |   |   |   |   |   |  |
| Rh#034 <i>Xenopus tropicalis</i>           | FHDQP    | YWE                                   | FP                       | H                   | L            | A            | S          | H     | L           |        |          |       |      |      |        |      |        |       |   |   |   |   |   |   |   |   |   |   |   |  |
| Rh#035 <i>Gallus gallus</i>                | FEDQM    | YWE                                   | FP                       | H                   | L            | A            | V          | G     | F           |        |          |       |      |      |        |      |        |       |   |   |   |   |   |   |   |   |   |   |   |  |
| Rh#036 <i>Mus musculus</i>                 | FDDQT    | FW                                    | E                        | FP                  | H            | L            | A          | V     | G           | F      |          |       |      |      |        |      |        |       |   |   |   |   |   |   |   |   |   |   |   |  |
| Rh#037 <i>Oncorhynchus mykiss</i>          | FDDQA    | FWE                                   | FP                       | H                   | Q            | A            | G          | K     | R           |        |          |       |      |      |        |      |        |       |   |   |   |   |   |   |   |   |   |   |   |  |
| Rh#038 <i>Rattus norvegicus</i>            | FDDQA    | FWE                                   | FP                       | H                   | L            | A            | V          | E     | F           |        |          |       |      |      |        |      |        |       |   |   |   |   |   |   |   |   |   |   |   |  |
| Rh#039 <i>Bos taurus</i>                   | FDDQS    | FWK                                   | FP                       | H                   | L            | A            | V          | G     | Y           |        |          |       |      |      |        |      |        |       |   |   |   |   |   |   |   |   |   |   |   |  |
| Rh#040 <i>Callithrix jacchus</i>           | FDDQA    | F                                     |                          |                     |              |              |            |       |             |        |          |       |      |      |        |      |        |       |   |   |   |   |   |   |   |   |   |   |   |  |
| Rh#041 <i>Canis familiaris</i>             | FDDQA    | S                                     | W                        | E                   | FP           | H            | L          | A     | V           | G      | F        |       |      |      |        |      |        |       |   |   |   |   |   |   |   |   |   |   |   |  |
| Rh#042 <i>Cebus apella</i>                 | FDDQA    | F                                     |                          |                     |              |              |            |       |             |        |          |       |      |      |        |      |        |       |   |   |   |   |   |   |   |   |   |   |   |  |
| Rh#043 <i>Macaca fascicularis</i>          | FDDQA    | FWE                                   | FP                       | H                   | L            | A            | V          | G     | F           |        |          |       |      |      |        |      |        |       |   |   |   |   |   |   |   |   |   |   |   |  |
| Rh#044 <i>Macaca mulatta</i>               | FDDQA    | FWE                                   | FP                       | H                   | L            | A            | V          | G     | F           |        |          |       |      |      |        |      |        |       |   |   |   |   |   |   |   |   |   |   |   |  |
| Rh#045 <i>Sus scrofa</i>                   | FNDQT    | FWK                                   | FP                       | H                   | L            | A            | A          | G     | Y           |        |          |       |      |      |        |      |        |       |   |   |   |   |   |   |   |   |   |   |   |  |
| Rh#046 <i>Gorilla gorilla</i>              | FDDQV    | FWK                                   | FP                       | H                   | L            | A            | V          | G     | F           |        |          |       |      |      |        |      |        |       |   |   |   |   |   |   |   |   |   |   |   |  |
| Rh#047 <i>Papio papio</i>                  | FDDQA    | F                                     |                          |                     |              |              |            |       |             |        |          |       |      |      |        |      |        |       |   |   |   |   |   |   |   |   |   |   |   |  |
| Rh#048 <i>Pongo pygmaeus</i>               | FDDQA    | FWK                                   | FP                       | H                   | L            | A            | V          | G     | F           |        |          |       |      |      |        |      |        |       |   |   |   |   |   |   |   |   |   |   |   |  |
| Rh#049 <i>Pan troglodytes</i>              | FDDQV    | FWK                                   | FP                       | H                   | L            | A            | V          | E     | F           |        |          |       |      |      |        |      |        |       |   |   |   |   |   |   |   |   |   |   |   |  |
| Rh#050 <i>Homo sapiens</i>                 | FDDQV    | FWK                                   | FP                       | H                   | L            | A            | V          | G     | F           |        |          |       |      |      |        |      |        |       |   |   |   |   |   |   |   |   |   |   |   |  |
| Rh#051 <i>Papio hamadryas</i>              | YDDS     | VYWE                                  | V                        | P                   | I            | L            | R          | E     | P           | D      | H        | F     | H    | G    | H      | G    | D      | H     | S | Q | L | E | P | E | V |   |   |   |   |  |
| Rh#052 <i>Takifugu rubripes</i>            | YDDS     | LYWE                                  | V                        | P                   | D            | E            | E          | E     | S           | G      | E        | F     | A    | H    | A      | D    | H      | S     | K | N | K | A | E | V |   |   |   |   |   |  |
| Rh#053 <i>Danio rerio</i>                  | FDDS     | IYWE                                  | V                        | P                   | E            | E            | E          | E     | E           | T      | E        | R     | L    | T    | H      | G    | D      | S     | K | N | K | A | E | A |   |   |   |   |   |  |
| Rh#054 <i>Tetraodon nigroviridis</i>       | YDDS     | LYWE                                  | V                        | P                   | D            | E            | E          | E     | E           | N      | E        | S     | L    | T    | H      | A    | D      | H     | S | K | N | K | A | E | V |   |   |   |   |  |
| Rh#055 <i>Ambystoma tigrinum</i>           | YDDS     | LYWE                                  | V                        | P                   | L            | D            | E          | E     | E           | Q      | P        | N     | H    | Y    | Q      | E    | D      | Q     | S | K | M | K | V | D | A |   |   |   |   |  |
| Rh#056 <i>Xenopus laevis</i>               | YDDS     | IYWE                                  | V                        | P                   | L            | E            | E          | P     | E           | Q      | E        | N     | Q    | H    | Q      | N    | E      | H     | G | K | I | L | E | A |   |   |   |   |   |  |
| Rh#057 <i>Xenopus tropicalis</i>           | YDDS     | IYWE                                  | V                        | P                   | L            | E            | E          | P     | E           | Q      | E        | H     | Q    | Y    | D      | E    | H      | G     | K | I | K | S | D | A |   |   |   |   |   |  |
| Rh#058 <i>Gallus gallus</i>                | FDDSA    | YWE                                   | V                        | P                   | E            | E            | E          | K     | L           | P      | E        | I     | N    | S    | N      | N    | Y      | D     | E | H | S | R | F | E | A | I | M |   |   |  |
| Rh#059 <i>Mus musculus</i>                 | YDDS     | V                                     | S                        | W                   | K            | V            | P          | K     | F           | R      | E        | L     | D    | N    | R      | F    | F      | Q     | H | A | N | H | N | H | V | E | H | E | V |  |

|                                      | 390       | 400         | 410              | 420                  |                    |              |          |            |        |
|--------------------------------------|-----------|-------------|------------------|----------------------|--------------------|--------------|----------|------------|--------|
| Rh#060 <i>Rattus norvegicus</i>      | FDDS      | VSWKVPKYRE  | LDNY F           | FQHV THNHVEHEV       |                    |              |          |            |        |
| Rh#061 <i>Bos taurus</i>             | YDDSVYWEV | PERKEYDNH   | FHEL             | LLS TLH              |                    |              |          |            |        |
| Rh#062 <i>Canis familiaris</i>       | FDDSVYWEV | PKEKE       | LDNV             |                      |                    |              |          |            |        |
| Rh#063 <i>Cebus apella</i>           | YDDSVYWKV | PRLTEHDNR   | FH               |                      |                    |              |          |            |        |
| Rh#064 <i>Gorilla gorilla</i>        | YDDSVYWKV | PKAR        |                  |                      |                    |              |          |            |        |
| Rh#065 <i>Hylobates sp</i>           | YDDSVYWEV | PRVRE LDN   | PYY GHGDHSQLE    | PEV                  |                    |              |          |            |        |
| Rh#066 <i>Macaca fascicularis</i>    | YDDSVYWEV | PI LREPD    | DHH FHGHGDHSQLE  | PEV                  |                    |              |          |            |        |
| Rh#067 <i>Macaca mulatta</i>         | YDDSVYWEV | PI LREPD    | NH FHGHGDHSQLE   | PEV                  |                    |              |          |            |        |
| Rh#068 <i>Pongo pygmaeus</i>         | YDDSVYWEV | PRLRES      | GN Y FQGHGDHSQLE | PEV                  |                    |              |          |            |        |
| Rh#069 <i>Pan troglodytes</i>        | YDDSVYWKV | PKAR        |                  |                      |                    |              |          |            |        |
| Rh#070 <i>Homo sapiens</i>           | YDDSVYWKV | PKTR        |                  |                      |                    |              |          |            |        |
| Rh#071 <i>Danio rerio</i>            | FEDAVYWEV | PGEEDHHE    | LNEVS            | TQNEVEK LNS          |                    |              |          |            |        |
| Rh#072 <i>Takifugu rubripes</i>      | FEDSVYWEV | PGSES       | PEEGE            | LTSVKPEE TEHLNS      |                    |              |          |            |        |
| Rh#073 <i>Oryctolagus cuniculus</i>  | YEDQMCWEV | PGEHGYEAQEA | LRVEEP           | PDTEA                |                    |              |          |            |        |
| Rh#074 <i>Oryzias latipes</i>        | FEDSLYWEV | PGEES       | HEDQL TTVK       | TEESDK LNS           |                    |              |          |            |        |
| Rh#075 <i>Tetraodon nigroviridis</i> | FEDGVYWEV | PESEAP      | HEAQL TTVR       | TEE TEK LSS          |                    |              |          |            |        |
| Rh#076 <i>Xenopus tropicalis</i>     | FEDAVYWEV | PGGE        | GHQL TVV INNED   | PD TQA               |                    |              |          |            |        |
| Rh#077 <i>Xenopus laevis</i>         | FEDAVYWEV | PGGE        | GHQL TVVVN       | NED PD TQA           |                    |              |          |            |        |
| Rh#078 <i>Gallus gallus</i>          | LESKALRE  | VDEDDG      | CDHGT            | SSEERRT IA           |                    |              |          |            |        |
| Rh#079 <i>Mus musculus</i>           | FEDQVYWEV | PGEQE       | TE TQRP          | LRGGESD TRA          |                    |              |          |            |        |
| Rh#080 <i>Rattus norvegicus</i>      | FEDQVYWEV | PGEQEA      | TQRP             | LR TEE PD TQA        |                    |              |          |            |        |
| Rh#081 <i>Canis familiaris</i>       | YEDQVYWEV | PGEHEDAA    | QGPL             | LKAAE PD TQA         |                    |              |          |            |        |
| Rh#082 <i>Bos taurus</i>             | YEDQIYWEV | PGEHEH      | LAQGS            | EE TE TQA            |                    |              |          |            |        |
| Rh#083 <i>Hylobates sp</i>           | YEDQVHWQV | PGEHEDKA    | QRLV             | EEAD TQA             |                    |              |          |            |        |
| Rh#084 <i>Sus scrofa</i>             | YEDQIYWEV | PEEHAD      | LAQGS            | LRPEE PD TQA         |                    |              |          |            |        |
| Rh#085 <i>Macaca mulatta</i>         | YEDQVHWQV | PGEHEDEA    | QRLV             | EEAD TQA             |                    |              |          |            |        |
| Rh#086 <i>Papio hamadryas</i>        | YEDQVHWQV | PGEHEDEA    | QRLV             | EEAD TQA             |                    |              |          |            |        |
| Rh#087 <i>Pongo pygmaeus</i>         | YEDQVHWQV | PGEHEDKA    | QRLV             | EEAD TQA             |                    |              |          |            |        |
| Rh#088 <i>Gorilla gorilla</i>        | YEDQVHWQV | PGEHEDKA    | QRLV             | EEAD TYA             |                    |              |          |            |        |
| Rh#089 <i>Pan troglodytes</i>        | YEDQVHWQV | PGEHEDKA    | QRLV             | EEAD TQA             |                    |              |          |            |        |
| Rh#090 <i>Homo sapiens</i>           | YEDQVHWQV | PGEHEDKA    | QRLV             | EEAD TQA             |                    |              |          |            |        |
| Rh#091 <i>Oncorhynchus mykiss</i>    | FDDEVYWE  | LPDEEEE     | HQES I PP        | I LEYNNHM IHKRQDLSE  | NFSVEHCES          |              |          |            |        |
| Rh#092 <i>Danio rerio</i>            | FNDEMYWE  | VPEDEE      | I PPV            | LSYNNHM I PNNKHEEMRE | TNFAEQS            |              |          |            |        |
| Rh#093 <i>Takifugu rubripes</i>      | FDDEAYWE  | VPEDEE      | T I PPV          | LEYNNHM IHKHQD       | IAE TNFSVEQS       |              |          |            |        |
| Rh#094 <i>Danio rerio</i>            | FDDDIYWE  | VPEEEDEN    | I PA             | FGHQNMMHVERT         | PD A               |              |          |            |        |
| Rh#095 <i>Oryctolagus cuniculus</i>  | FDDSIYWE  | MHEEKSSS    | PEDH             | THK PSV P            | TE PVEQP TSSA TLAP |              |          |            |        |
| Rh#096 <i>Tetraodon nigroviridis</i> | FNDEPYWE  | LPEEEE      | I PP             | I LHYNNHMMV          | NKDV               |              |          |            |        |
| Rh#097 <i>Oryzias latipes</i>        | FDDEAYWE  | LPEEEE      | T I PPV          | LEYNNHMTQK           | HQE TPE TS FSVVES  |              |          |            |        |
| Rh#098 <i>Xenopus tropicalis</i>     | FDDEVYWE  | LPEEDEEE    | H LGAANQYV       | THL PEN              | FKLPDR TEVA FK     |              |          |            |        |
| Rh#099 <i>Xenopus laevis</i>         | FDDDVYWE  | LREEDEEE    | H LGAANQY        | I THL                | PENFKLPDR TE IS FK |              |          |            |        |
| Rh#100 <i>Gallus gallus</i>          | FEDDIYWE  | VPEDEE      | SDVYHMHN         | PDKAAS               | P                  |              |          |            |        |
| Rh#101 <i>Mus musculus</i>           | FEDSIYWE  | VHEEVN      | TVY I            | PEDLAHKHS            | TS LVPA I PLVLS    | TPSAS IVP PV | PTPPVSLA | TSAP       | SAALVH |
| Rh#102 <i>Rattus norvegicus</i>      | FEDAIYWE  | VPEEVN      | TVY I            | PEDLAHKHS            | TS LVPA I PLVLS    | TPSAS IVP PV | PTPPASLA | TV TSSSLVH |        |
| Rh#103 <i>Bos taurus</i>             | FEDAVYWE  | I PKEP      | KS TALR          | SEDSS IK             | PPPEP              |              |          |            |        |
| Rh#104 <i>Canis familiaris</i>       | FEDA IYWE | MPEEP       | KS TV LHP        | EDS TLK              | PSEP               |              |          |            |        |
| Rh#105 <i>Pongo pygmaeus</i>         | FEDAVYWE  | MPEGNS      | TVY I            | PEDP TFK             | PSGSPV             | PSV PMVSP    | PLPMASSV | PLVP       |        |
| Rh#106 <i>Pan troglodytes</i>        | FEDAVYWE  | MPEGNS      | TVY I            | PEDP TFK             | PSGSPV             | PSV PMVSP    | PLPMASSV | PLVP       |        |
| Rh#107 <i>Homo sapiens</i>           | FEDAVYWE  | MPEGNS      | TVY I            | PEDP TFK             | PSGSPV             | PSV PMVSP    | PLPMASSV | PLVP       |        |
| Rh#108 <i>Takifugu rubripes</i>      | FNDEPYWE  | G I FHSKA   | TRAAP            | QCCLVAAE             | THVCF              | PNRSNSA      | WCFQVQLR |            |        |
| Rh#109 <i>Tetraodon nigroviridis</i> | FDDEAYWE  | V           |                  |                      |                    |              |          |            |        |
| Rh#110 <i>Homo sapiens</i>           | FDDQV     | FWK FPHLAV  | GF               |                      |                    |              |          |            |        |
| Rh#111 <i>Gallus gallus</i>          | FEDQMYWE  | FPHLAV      | GF               |                      |                    |              |          |            |        |

|                                          |                                                                                                                                                                  |
|------------------------------------------|------------------------------------------------------------------------------------------------------------------------------------------------------------------|
| Rh#001.1 <i>Nitrosomonas europaea</i>    | -                                                                                                                                                                |
| Rh#001.2 <i>Nitrosospira multiformis</i> | -                                                                                                                                                                |
| Rh#001.3 <i>Acidobacteria bacterium</i>  | -                                                                                                                                                                |
| Rh#001.4 <i>Candidatus Kuenenia</i>      | -                                                                                                                                                                |
| Rh#002 <i>Danio rerio</i>                | -                                                                                                                                                                |
| Rh#003 <i>Takifugu rubripes</i>          | -                                                                                                                                                                |
| Rh#004 <i>Takifugu rubripes</i>          | -                                                                                                                                                                |
| Rh#005 <i>Takifugu rubripes</i>          | -                                                                                                                                                                |
| Rh#006 <i>Tetraodon nigroviridis</i>     | -                                                                                                                                                                |
| Rh#007 <i>Xenopus tropicalis</i>         | -                                                                                                                                                                |
| Rh#008 <i>Chlamydomonas reinhardtii</i>  | ENAA R P V Q P M V A G A G N V -                                                                                                                                 |
| Rh#009 <i>Chlamydomonas reinhardtii</i>  | SV P F L A F Q Q Q Q Q M A A A A A A H Q Y P Q P F M S T A V L M G G A A G G G G A N N D R P L F S D D V I G M E T A L A P V Q P M Q Q P A Y S Q A S A G P N N V |
| Rh#010 <i>Apis mellifera</i>             | -                                                                                                                                                                |
| Rh#011 <i>Dictyostelium discoideum</i>   | -                                                                                                                                                                |
| Rh#012 <i>Dictyostelium discoideum</i>   | K K S H S E H Q P Q H Q P E E S T F N N N N N N N N N N A T A E T T D N G G S S T N S P T S K V -                                                                |
| Rh#013 <i>Geodia cydonium</i>            | -                                                                                                                                                                |
| Rh#014 <i>Caenorhabditis elegans</i>     | -                                                                                                                                                                |
| Rh#015 <i>Caenorhabditis briggsae</i>    | -                                                                                                                                                                |
| Rh#016 <i>Caenorhabditis elegans</i>     | -                                                                                                                                                                |
| Rh#017 <i>Caenorhabditis briggsae</i>    | -                                                                                                                                                                |
| Rh#018 <i>Ciona intestinalis</i>         | -                                                                                                                                                                |
| Rh#019 <i>Ciona intestinalis</i>         | -                                                                                                                                                                |
| Rh#020 <i>Ciona intestinalis</i>         | -                                                                                                                                                                |
| Rh#021 <i>Carcinus maenas</i>            | -                                                                                                                                                                |
| Rh#022 <i>Anopheles gambiae</i>          | -                                                                                                                                                                |
| Rh#023 <i>Drosophila pseudoobscura</i>   | -                                                                                                                                                                |
| Rh#024 <i>Drosophila melanogaster</i>    | -                                                                                                                                                                |
| Rh#025 <i>Ciona savignyi</i>             | -                                                                                                                                                                |
| Rh#026 <i>Ciona savignyi</i>             | -                                                                                                                                                                |
| Rh#027 <i>Ciona savignyi</i>             | -                                                                                                                                                                |
| Rh#028 <i>Drosophila yakuba</i>          | -                                                                                                                                                                |
| Rh#029 <i>Danio rerio</i>                | -                                                                                                                                                                |
| Rh#030 <i>Salmo salar</i>                | -                                                                                                                                                                |
| Rh#031 <i>Takifugu rubripes</i>          | -                                                                                                                                                                |
| Rh#032 <i>Tetraodon nigroviridis</i>     | -                                                                                                                                                                |
| Rh#033 <i>Xenopus laevis</i>             | -                                                                                                                                                                |
| Rh#034 <i>Xenopus tropicalis</i>         | -                                                                                                                                                                |
| Rh#035 <i>Gallus gallus</i>              | -                                                                                                                                                                |
| Rh#036 <i>Mus musculus</i>               | -                                                                                                                                                                |
| Rh#037 <i>Oncorhynchus mykiss</i>        | -                                                                                                                                                                |
| Rh#038 <i>Rattus norvegicus</i>          | -                                                                                                                                                                |
| Rh#039 <i>Bos taurus</i>                 | -                                                                                                                                                                |
| Rh#040 <i>Callithrix jacchus</i>         | -                                                                                                                                                                |
| Rh#041 <i>Canis familiaris</i>           | -                                                                                                                                                                |
| Rh#042 <i>Cebus apella</i>               | -                                                                                                                                                                |
| Rh#043 <i>Macaca fascicularis</i>        | -                                                                                                                                                                |
| Rh#044 <i>Macaca mulatta</i>             | -                                                                                                                                                                |
| Rh#045 <i>Sus scrofa</i>                 | -                                                                                                                                                                |
| Rh#046 <i>Gorilla gorilla</i>            | -                                                                                                                                                                |
| Rh#047 <i>Papio papio</i>                | -                                                                                                                                                                |
| Rh#048 <i>Pongo pygmaeus</i>             | -                                                                                                                                                                |
| Rh#049 <i>Pan troglodytes</i>            | -                                                                                                                                                                |
| Rh#050 <i>Homo sapiens</i>               | -                                                                                                                                                                |
| Rh#051 <i>Papio hamadryas</i>            | -                                                                                                                                                                |
| Rh#052 <i>Takifugu rubripes</i>          | -                                                                                                                                                                |
| Rh#053 <i>Danio rerio</i>                | -                                                                                                                                                                |
| Rh#054 <i>Tetraodon nigroviridis</i>     | -                                                                                                                                                                |
| Rh#055 <i>Ambystoma tigrinum</i>         | -                                                                                                                                                                |
| Rh#056 <i>Xenopus laevis</i>             | -                                                                                                                                                                |
| Rh#057 <i>Xenopus tropicalis</i>         | -                                                                                                                                                                |
| Rh#058 <i>Gallus gallus</i>              | -                                                                                                                                                                |
| Rh#059 <i>Mus musculus</i>               | -                                                                                                                                                                |

Rh#060 *Rattus norvegicus* .....  
Rh#061 *Bos taurus* .....  
Rh#062 *Canis familiaris* .....  
Rh#063 *Cebus apella* .....  
Rh#064 *Gorilla gorilla* .....  
Rh#065 *Hylobates sp* .....  
Rh#066 *Macaca fascicularis* .....  
Rh#067 *Macaca mulatta* .....  
Rh#068 *Pongo pygmaeus* .....  
Rh#069 *Pan troglodytes* .....  
Rh#070 *Homo sapiens* .....  
Rh#071 *Danio rerio* .....  
Rh#072 *Takifugu rubripes* .....  
Rh#073 *Oryctolagus cuniculus* .....  
Rh#074 *Oryzias latipes* .....  
Rh#075 *Tetraodon nigroviridis* .....  
Rh#076 *Xenopus tropicalis* .....  
Rh#077 *Xenopus laevis* .....  
Rh#078 *Gallus gallus* .....  
Rh#079 *Mus musculus* .....  
Rh#080 *Rattus norvegicus* .....  
Rh#081 *Canis familiaris* .....  
Rh#082 *Bos taurus* .....  
Rh#083 *Hylobates sp* .....  
Rh#084 *Sus scrofa* .....  
Rh#085 *Macaca mulatta* .....  
Rh#086 *Papio hamadryas* .....  
Rh#087 *Pongo pygmaeus* .....  
Rh#088 *Gorilla gorilla* .....  
Rh#089 *Pan troglodytes* .....  
Rh#090 *Homo sapiens* .....  
Rh#091 *Oncorhynchus mykiss* .....  
Rh#092 *Danio rerio* .....  
Rh#093 *Takifugu rubripes* .....  
Rh#094 *Danio rerio* .....  
Rh#095 *Oryctolagus cuniculus* .....  
Rh#096 *Tetraodon nigroviridis* .....  
Rh#097 *Oryzias latipes* .....  
Rh#098 *Xenopus tropicalis* .....  
Rh#099 *Xenopus laevis* .....  
Rh#100 *Gallus gallus* .....  
Rh#101 *Mus musculus* .....  
Rh#102 *Rattus norvegicus* .....  
Rh#103 *Bos taurus* .....  
Rh#104 *Canis familiaris* .....  
Rh#105 *Pongo pygmaeus* .....  
Rh#106 *Pan troglodytes* .....  
Rh#107 *Homo sapiens* .....  
Rh#108 *Takifugu rubripes* .....  
Rh#109 *Tetraodon nigroviridis* .....  
Rh#110 *Homo sapiens* .....  
Rh#111 *Gallus gallus* .....
