# Supplementary material
Source: PubMed Central journal article supplement (PMC2148281)

**A**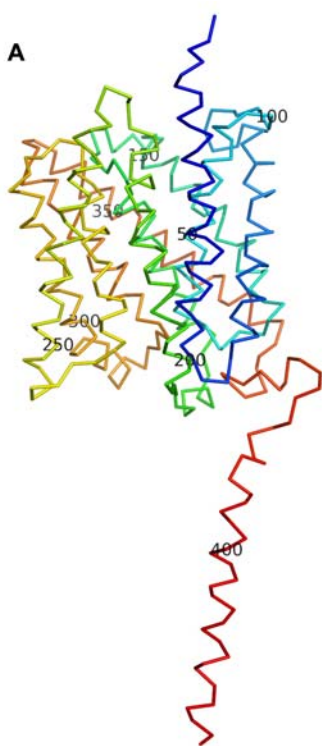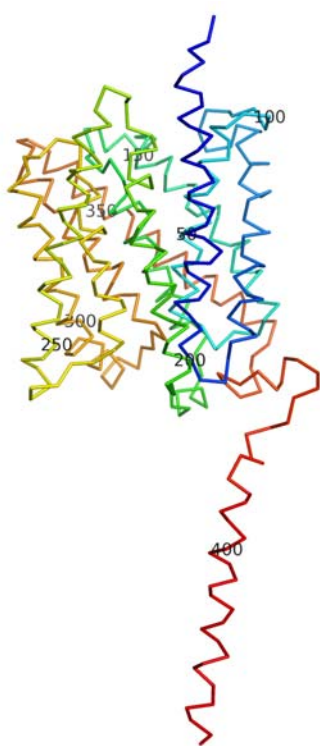**B**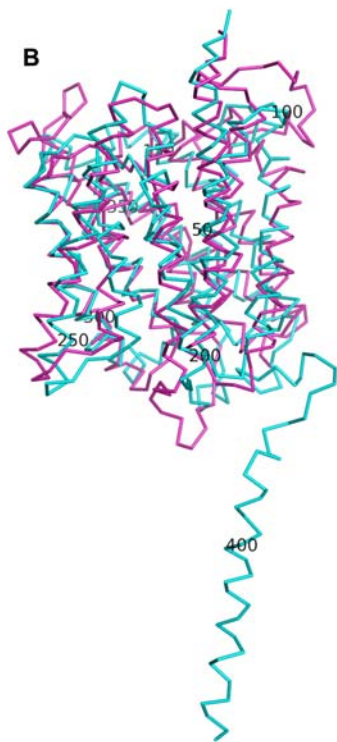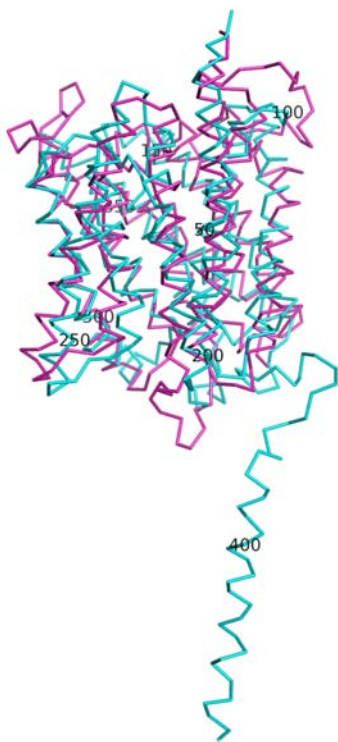

Supplement: pnas_0709710104_1.pdf [file pnas_0709710104_1.pdf]

**Rh Protein**

**Amt**

**Top View**

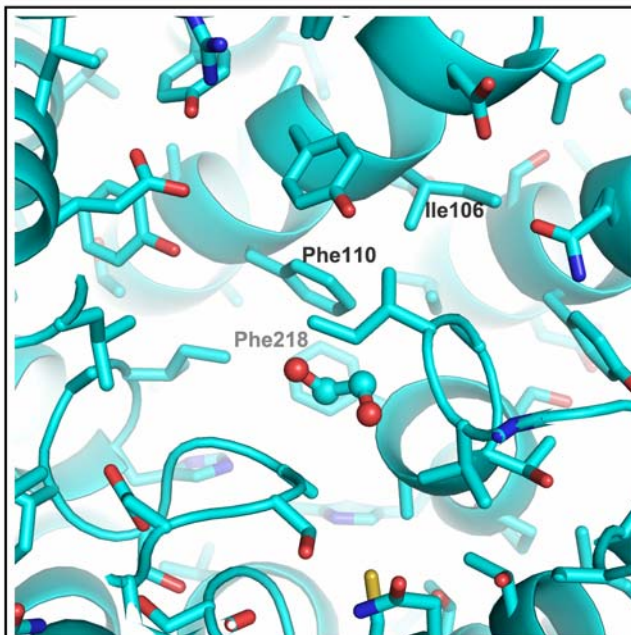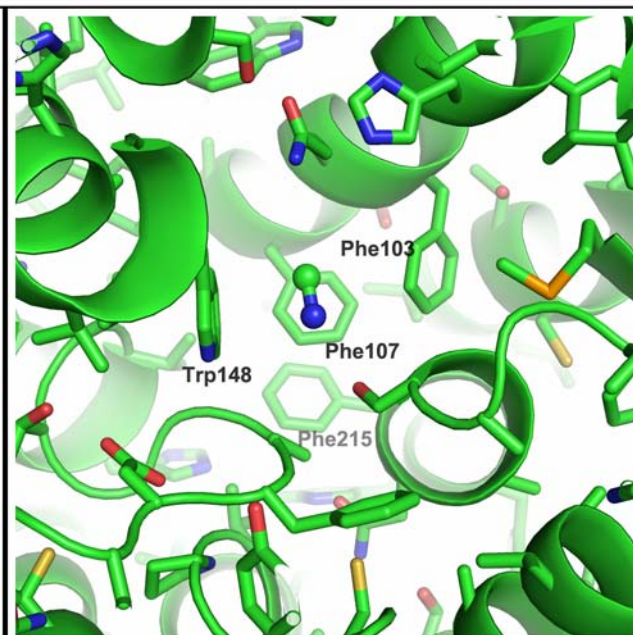

**Side View**

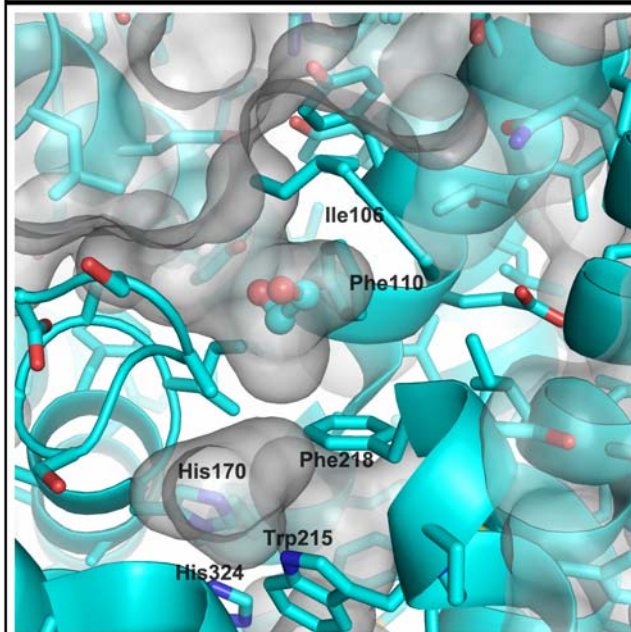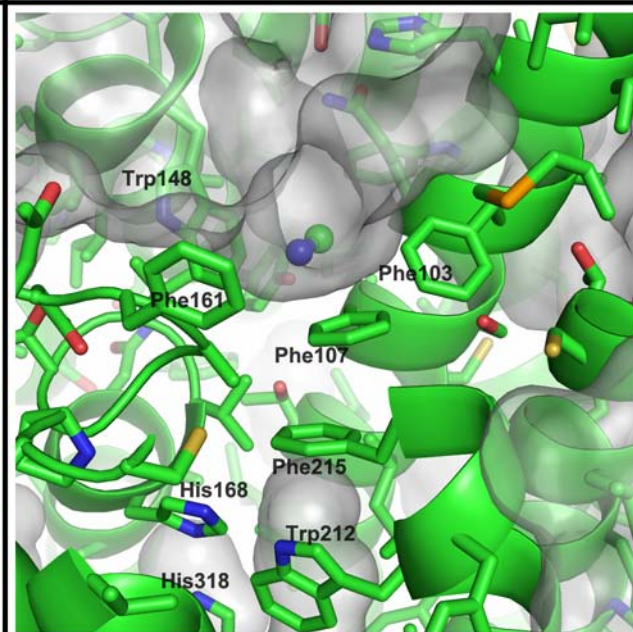

Supplement: pnas_0709710104_3.pdf [file pnas_0709710104_3.pdf]
